# Supplementary material for: International Survey on Mechanical Ventilation During Extracorporeal Membrane Oxygenation
Source: PubMed Central journal article supplement — ASAIO J. 2023 Dec 5;70(4):300–4. doi: 10.1097/MAT.0000000000002101 (PMC10977054; doi:10.1097/mat.0000000000002101), 2023-12-05
Supplement: mat-70-300-s001.pdf [file mat-70-300-s001.pdf]

### Q1 What is your role?

Answered: 52 Skipped: 0

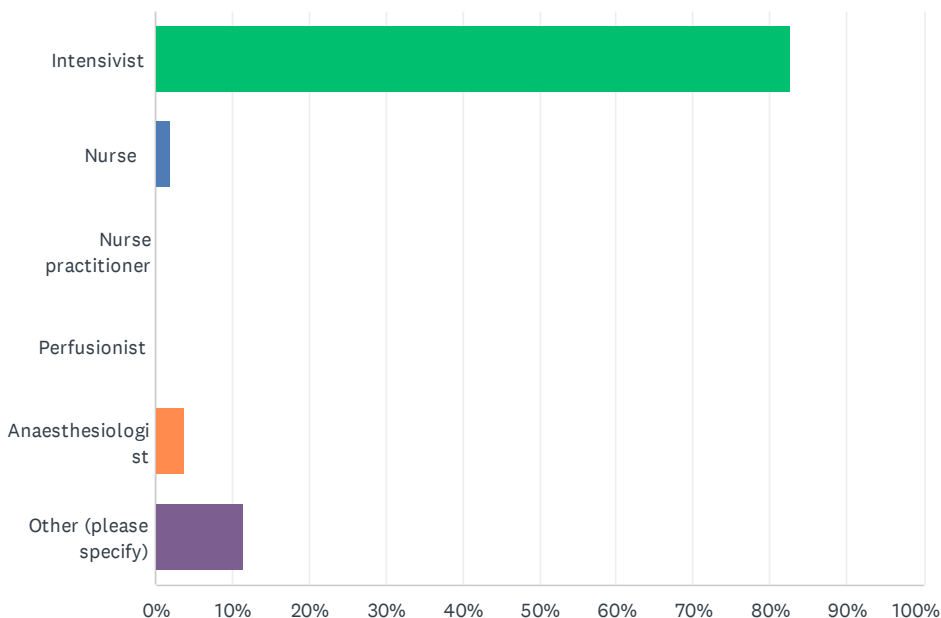

| ANSWER CHOICES         | RESPONSES |
|------------------------|-----------|
| Intensivist            | 82.69% 43 |
| Nurse                  | 1.92% 1   |
| Nurse practitioner     | 0.00% 0   |
| Perfusionist           | 0.00% 0   |
| Anaesthesiologist      | 3.85% 2   |
| Other (please specify) | 11.54% 6  |
| <b>TOTAL</b>           | <b>52</b> |

| # | OTHER (PLEASE SPECIFY)              | DATE                |
|---|-------------------------------------|---------------------|
| 1 | Cardiac Surgeon                     | 10/11/2022 10:39 PM |
| 2 | Advanced heart failure cardiologist | 10/7/2022 4:04 PM   |
| 3 | Medical Director                    | 9/23/2022 10:15 PM  |
| 4 | Advanced Heart Failure Cardiologist | 9/14/2022 5:37 PM   |
| 5 | Program Director ( Surgeon)         | 9/14/2022 3:41 PM   |
| 6 | surgeon                             | 9/14/2022 3:18 PM   |

## Q2 What is your practice setting?

Answered: 52 Skipped: 0

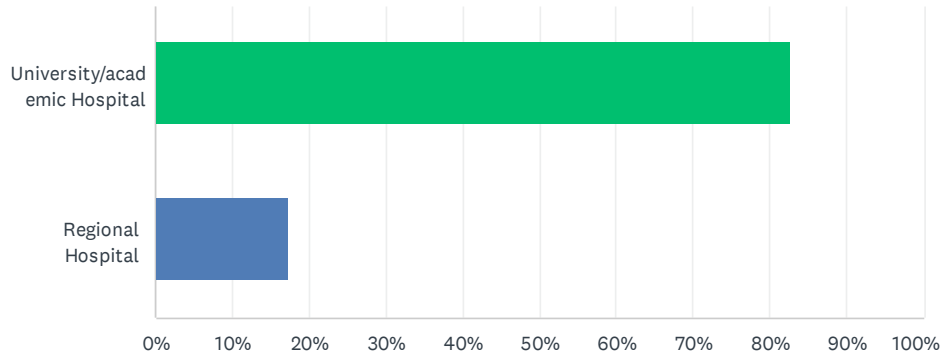

| ANSWER CHOICES               | RESPONSES |    |
|------------------------------|-----------|----|
| University/academic Hospital | 82.69%    | 43 |
| Regional Hospital            | 17.31%    | 9  |
| TOTAL                        |           | 52 |

### Q3 In which country do you currently practice?

Answered: 52 Skipped: 0

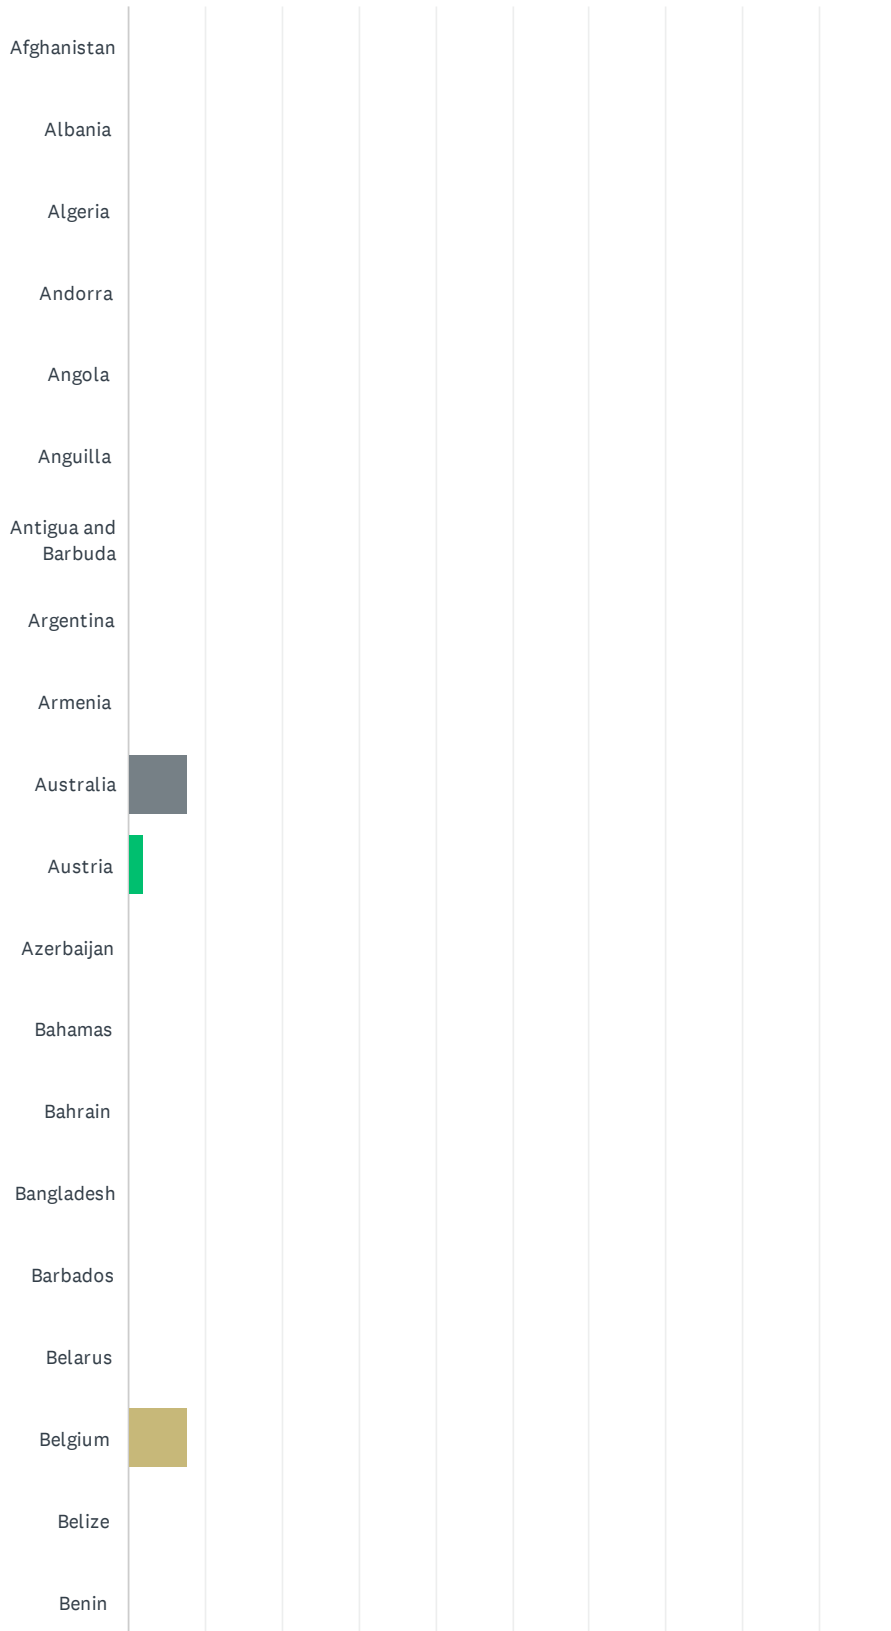

|                           |  |  |  |  |  |  |  |  |  |
|---------------------------|--|--|--|--|--|--|--|--|--|
| Bhutan                    |  |  |  |  |  |  |  |  |  |
| Bolivia<br>(Plurinatio... |  |  |  |  |  |  |  |  |  |
| Bosnia and<br>Herzegovina |  |  |  |  |  |  |  |  |  |
| Botswana                  |  |  |  |  |  |  |  |  |  |
| Brazil                    |  |  |  |  |  |  |  |  |  |
| British Virgin<br>Island  |  |  |  |  |  |  |  |  |  |
| Brunei<br>Darussalam      |  |  |  |  |  |  |  |  |  |
| Bulgaria                  |  |  |  |  |  |  |  |  |  |
| Burkina Faso              |  |  |  |  |  |  |  |  |  |
| Burundi                   |  |  |  |  |  |  |  |  |  |
| Cabo Verde                |  |  |  |  |  |  |  |  |  |
| Cambodia                  |  |  |  |  |  |  |  |  |  |
| Cameroon                  |  |  |  |  |  |  |  |  |  |
| Canada                    |  |  |  |  |  |  |  |  |  |
| Cayman Islands            |  |  |  |  |  |  |  |  |  |
| Central<br>African...     |  |  |  |  |  |  |  |  |  |
| Chad                      |  |  |  |  |  |  |  |  |  |
| Chile                     |  |  |  |  |  |  |  |  |  |
| China                     |  |  |  |  |  |  |  |  |  |
| Colombia                  |  |  |  |  |  |  |  |  |  |
| Comoros                   |  |  |  |  |  |  |  |  |  |
| Congo                     |  |  |  |  |  |  |  |  |  |

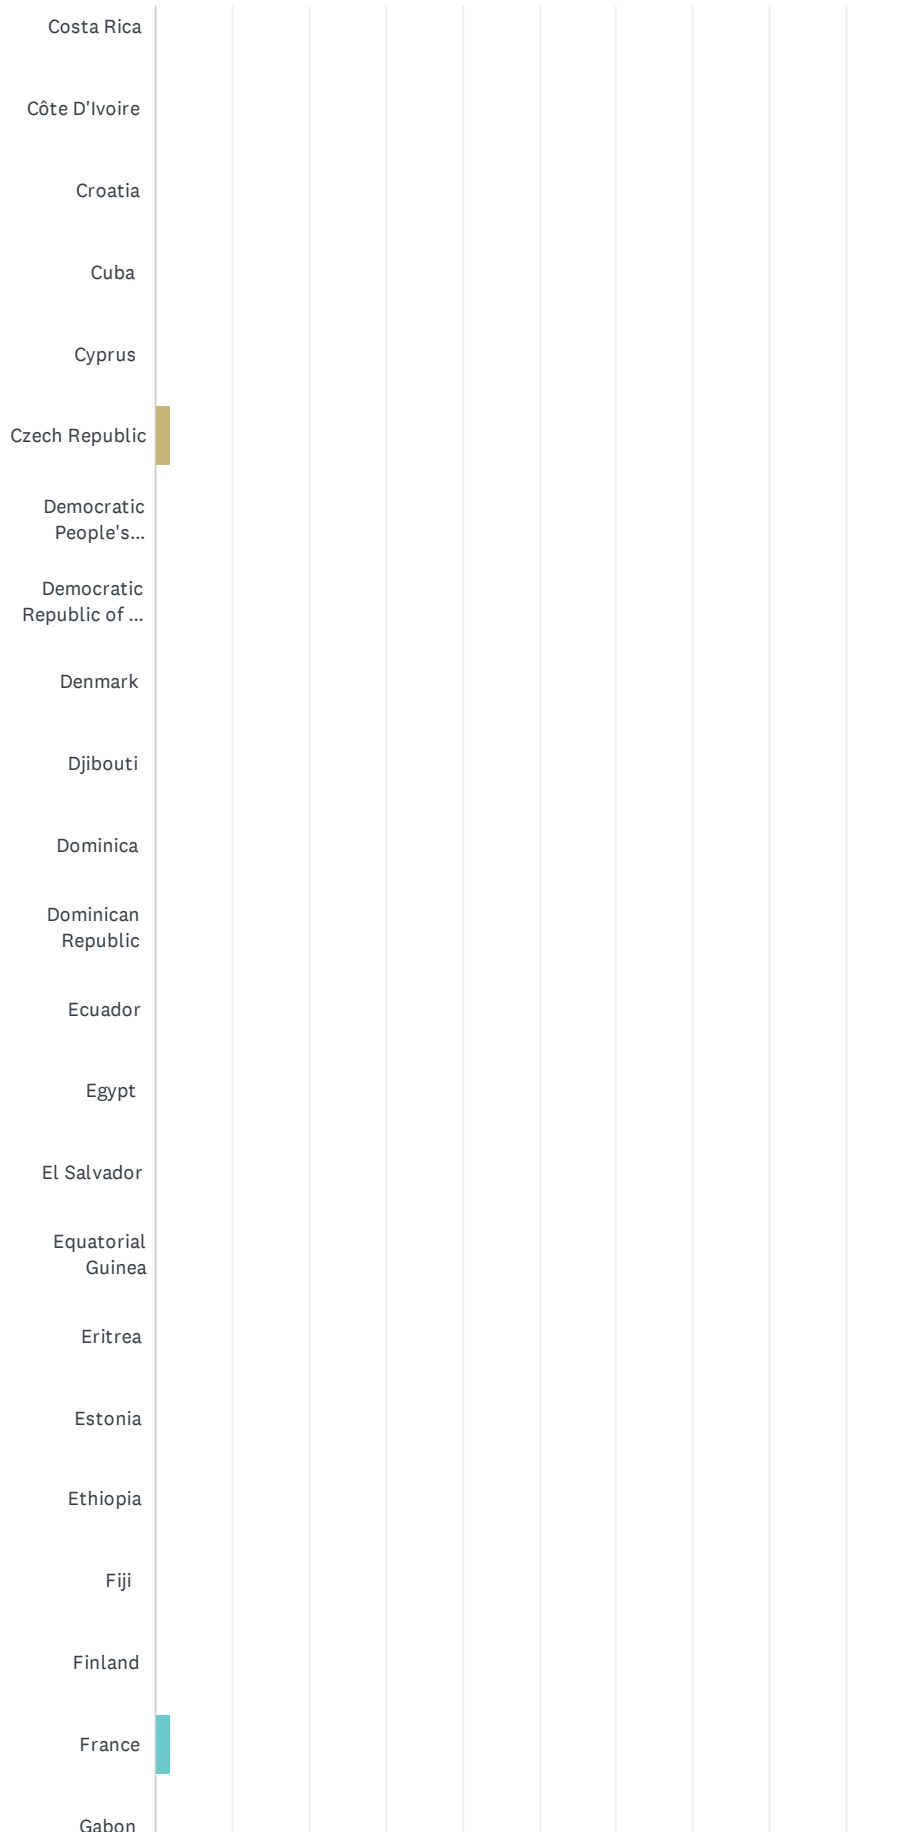

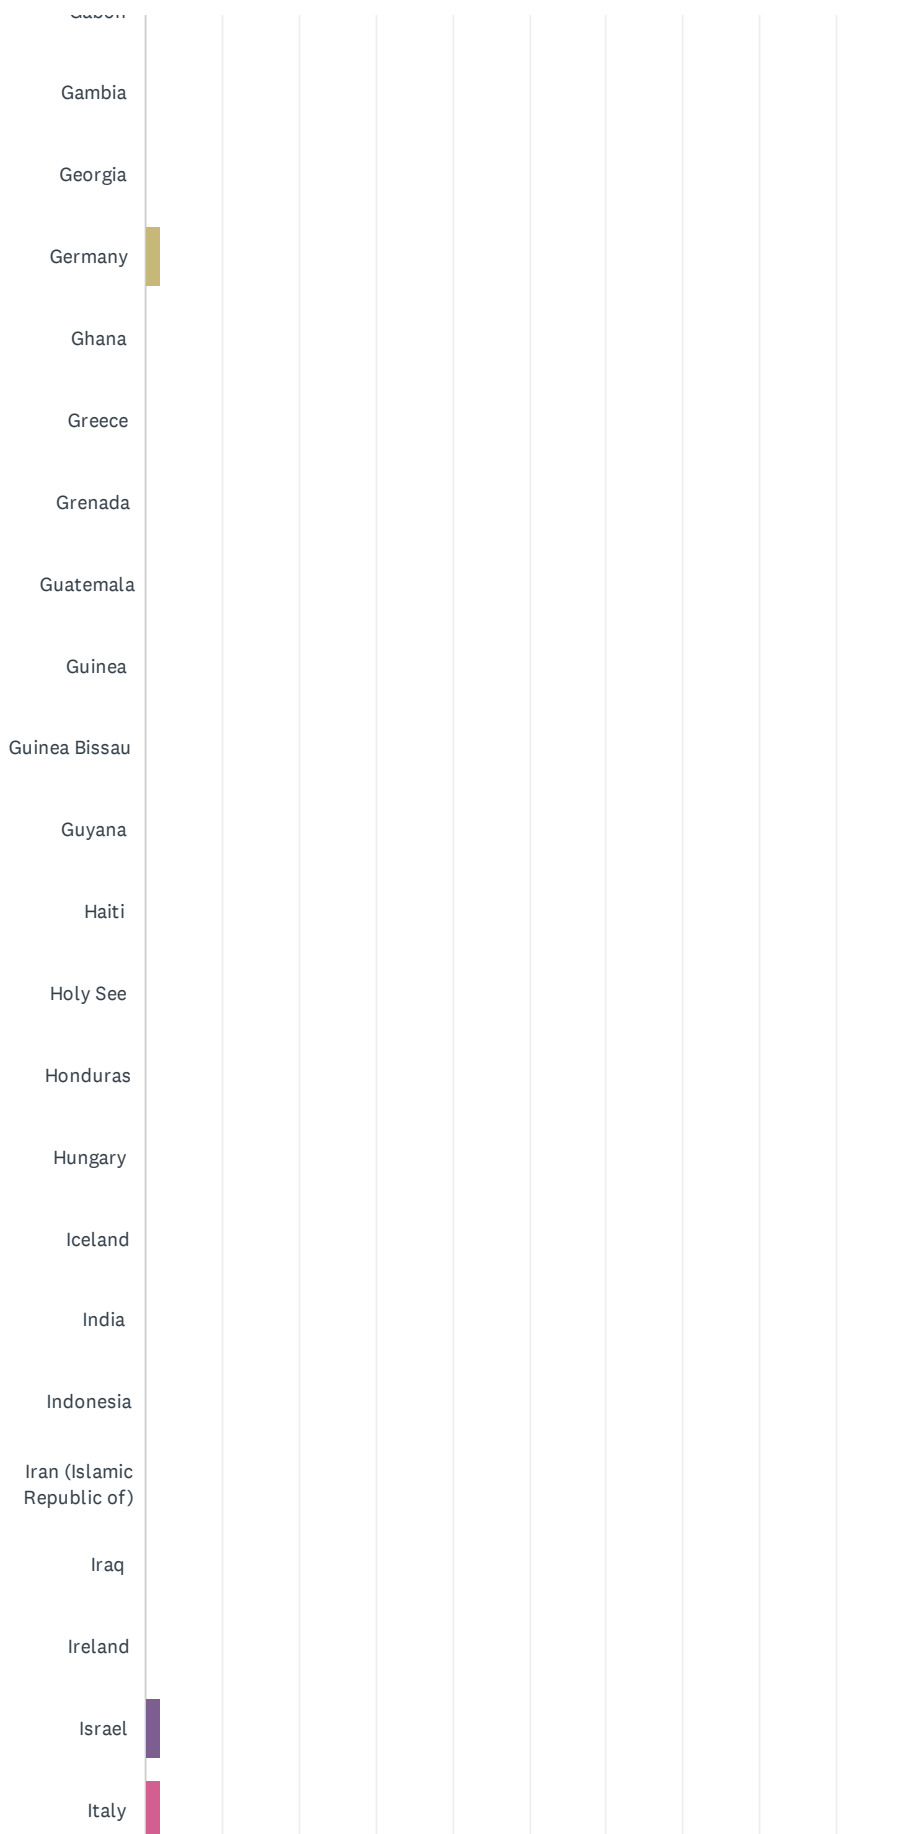

|                            |  |  |  |  |  |  |  |  |  |
|----------------------------|--|--|--|--|--|--|--|--|--|
| Jamaica                    |  |  |  |  |  |  |  |  |  |
| Japan                      |  |  |  |  |  |  |  |  |  |
| Jordan                     |  |  |  |  |  |  |  |  |  |
| Kazakhstan                 |  |  |  |  |  |  |  |  |  |
| Kenya                      |  |  |  |  |  |  |  |  |  |
| Kiribati                   |  |  |  |  |  |  |  |  |  |
| Kuwait                     |  |  |  |  |  |  |  |  |  |
| Kyrgyzstan                 |  |  |  |  |  |  |  |  |  |
| Lao People's Democratic... |  |  |  |  |  |  |  |  |  |
| Latvia                     |  |  |  |  |  |  |  |  |  |
| Lebanon                    |  |  |  |  |  |  |  |  |  |
| Lesotho                    |  |  |  |  |  |  |  |  |  |
| Liberia                    |  |  |  |  |  |  |  |  |  |
| Libya                      |  |  |  |  |  |  |  |  |  |
| Liechtenstein              |  |  |  |  |  |  |  |  |  |
| Lithuania                  |  |  |  |  |  |  |  |  |  |
| Luxembourg                 |  |  |  |  |  |  |  |  |  |
| Madagascar                 |  |  |  |  |  |  |  |  |  |
| Malawi                     |  |  |  |  |  |  |  |  |  |
| Malaysia                   |  |  |  |  |  |  |  |  |  |
| Maldives                   |  |  |  |  |  |  |  |  |  |
| Mali                       |  |  |  |  |  |  |  |  |  |

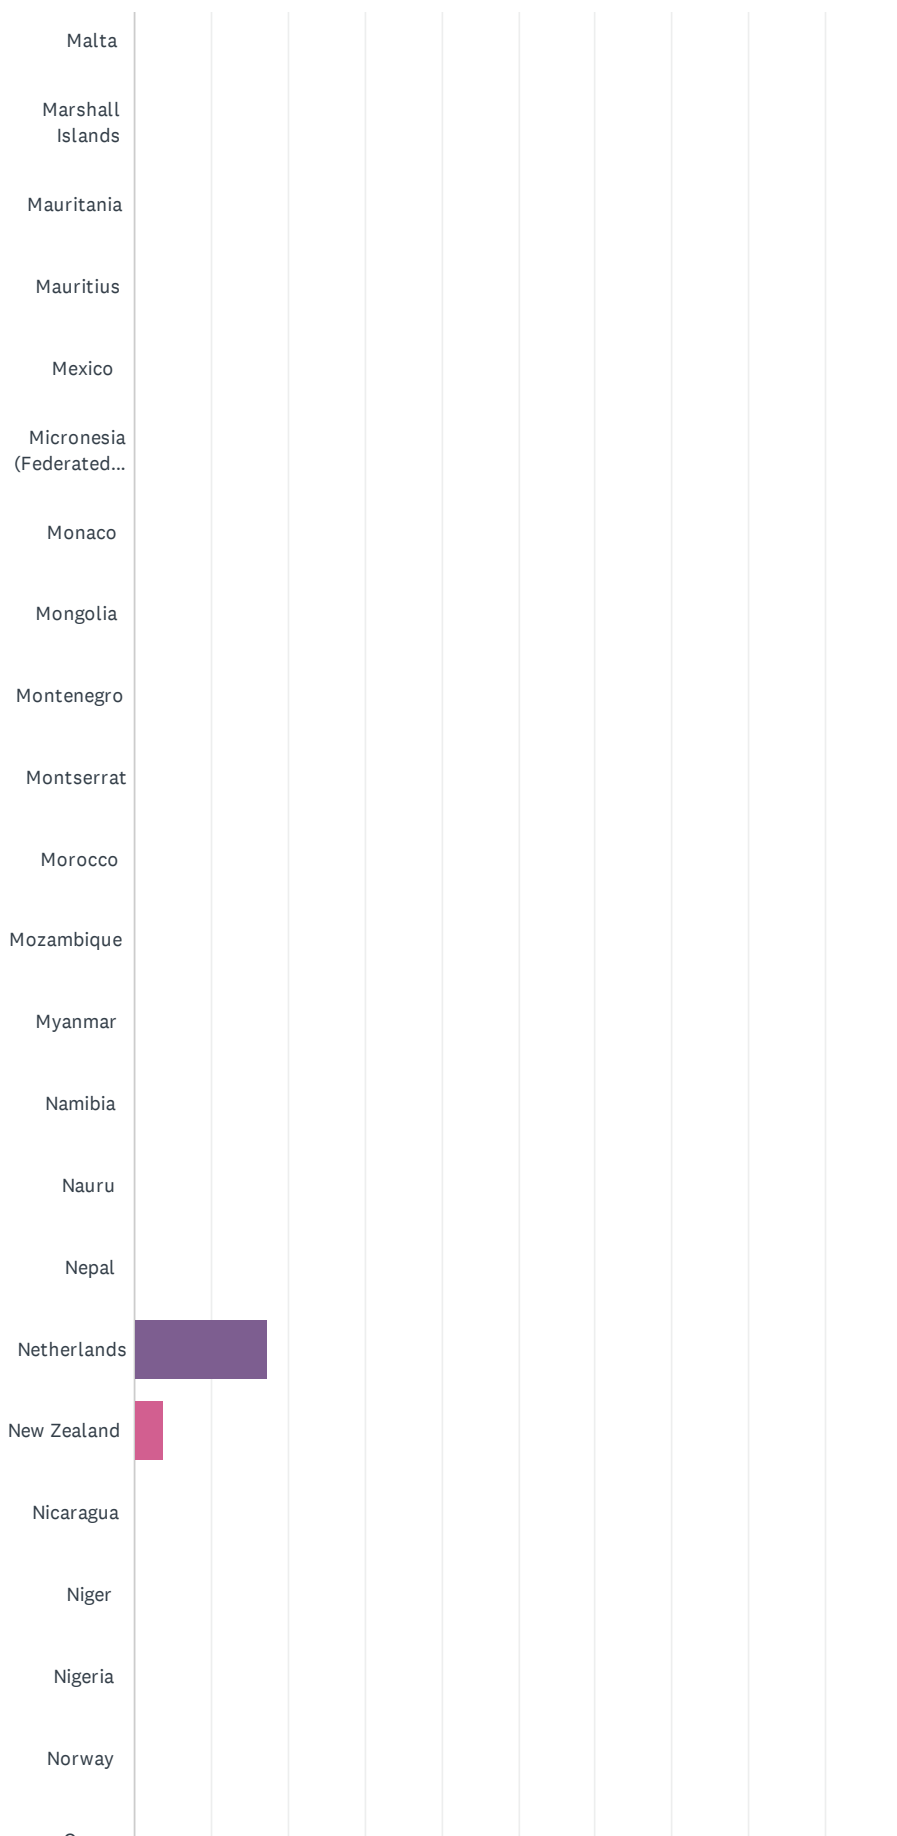



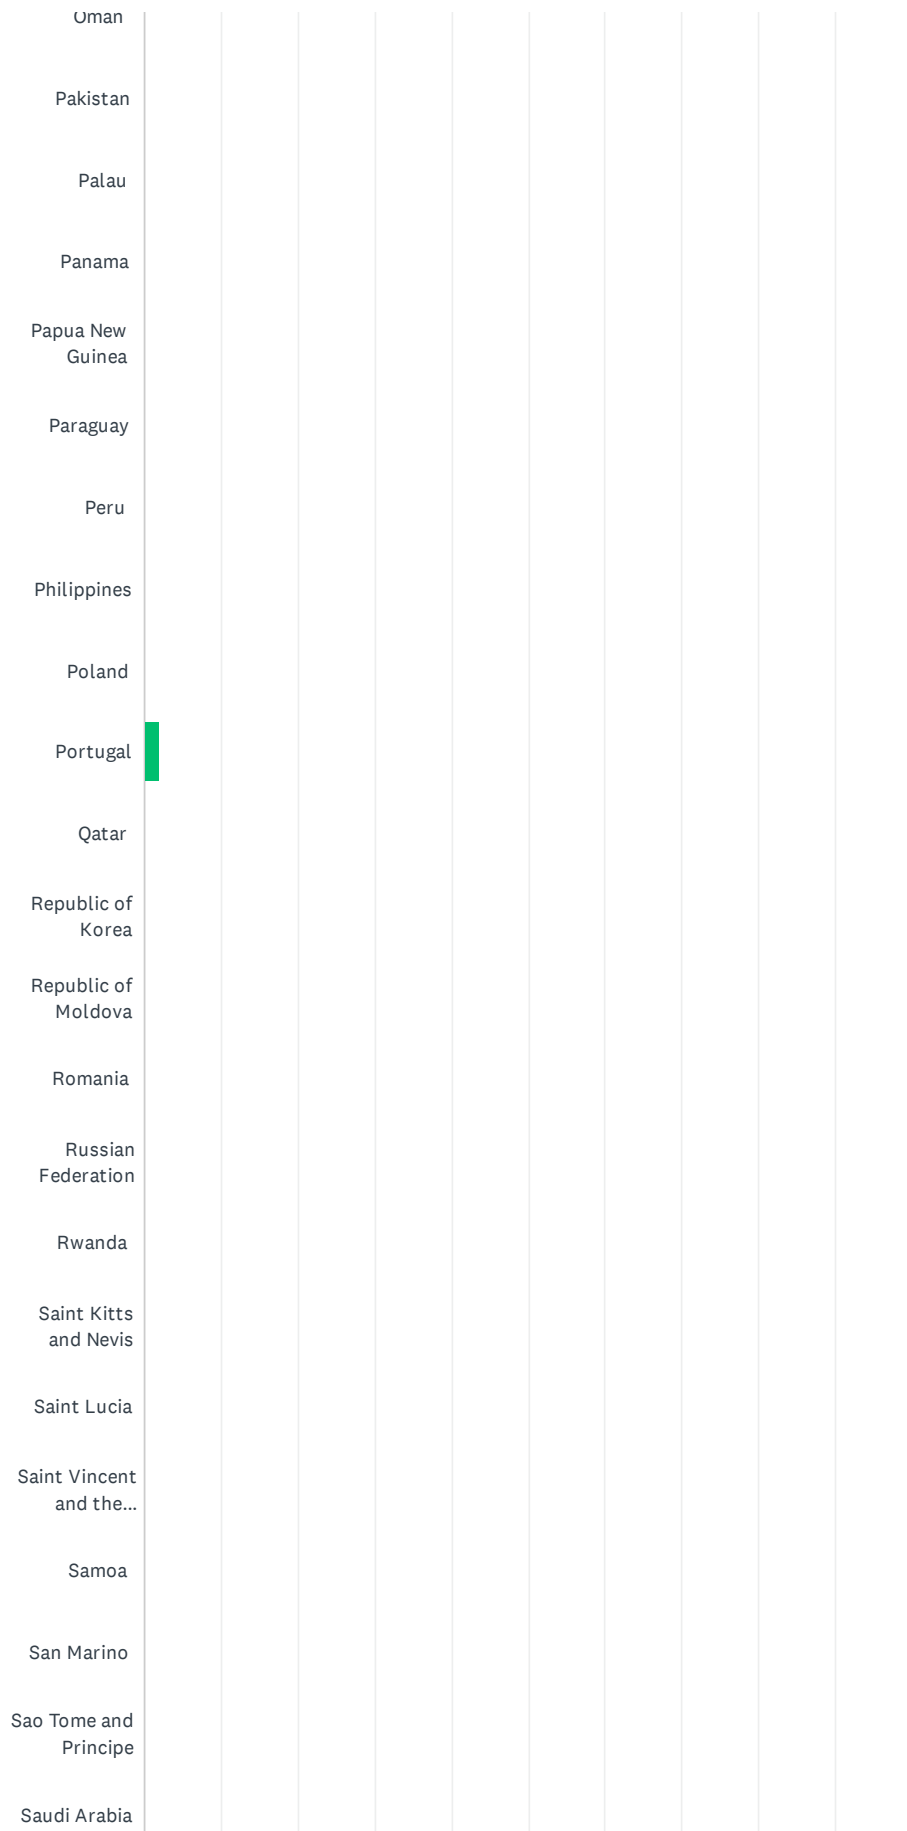

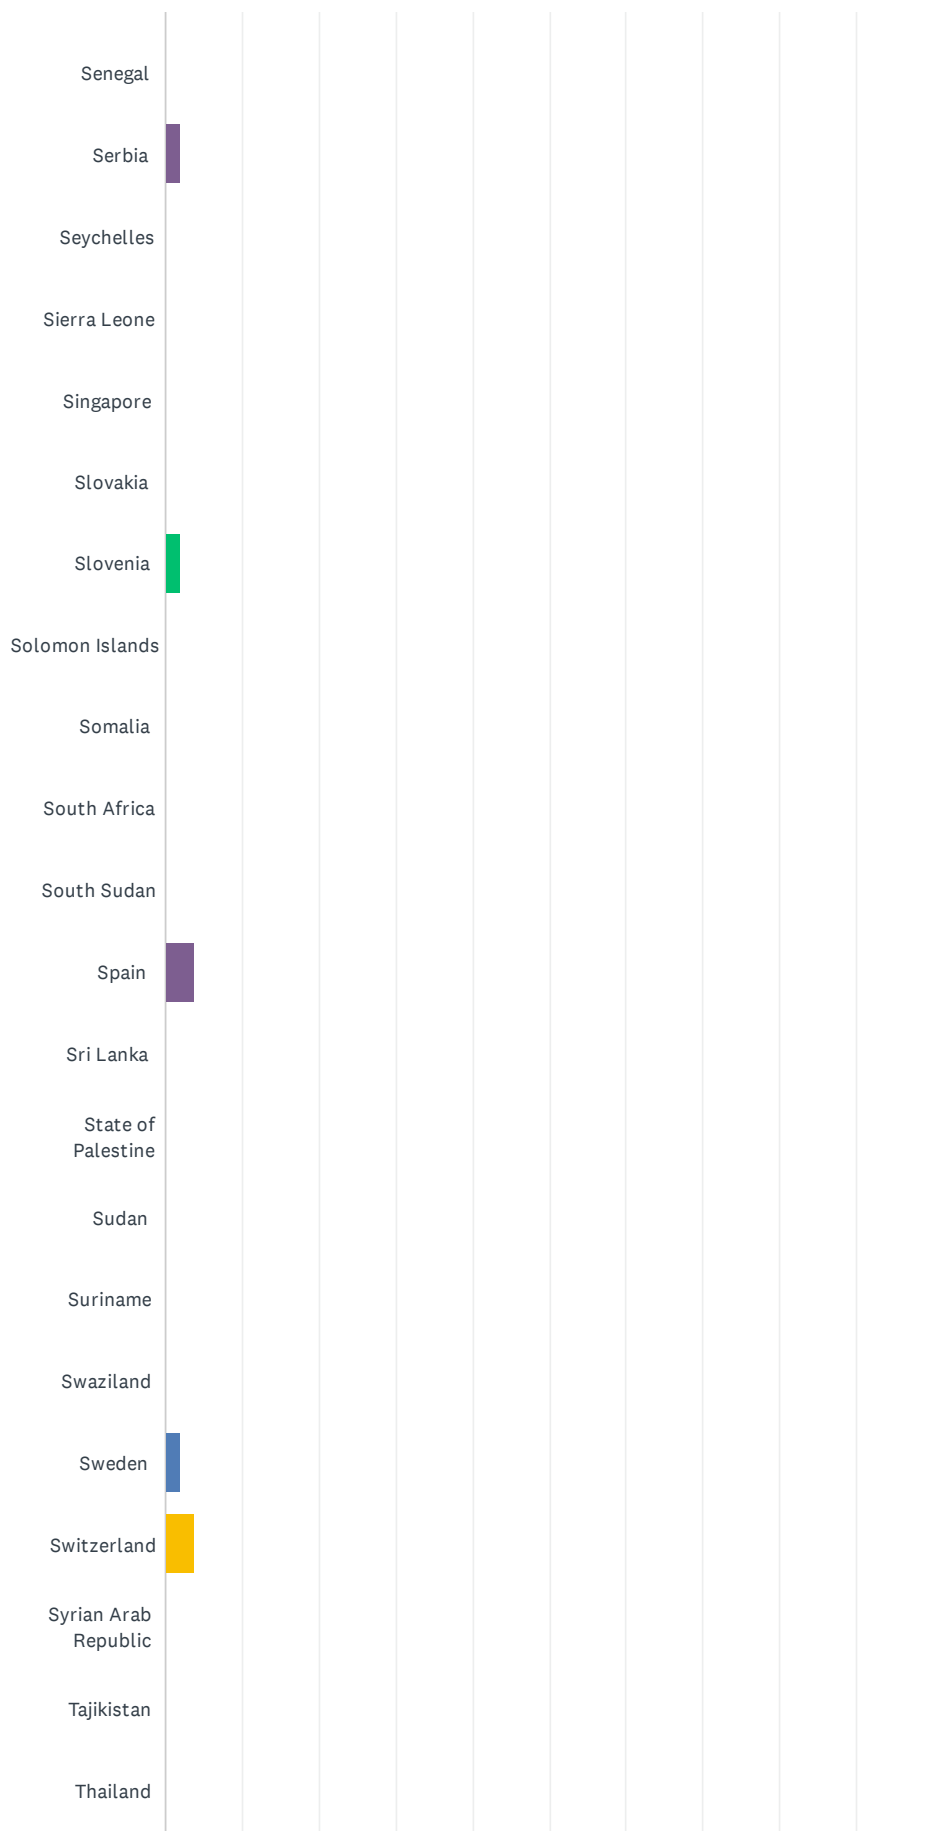

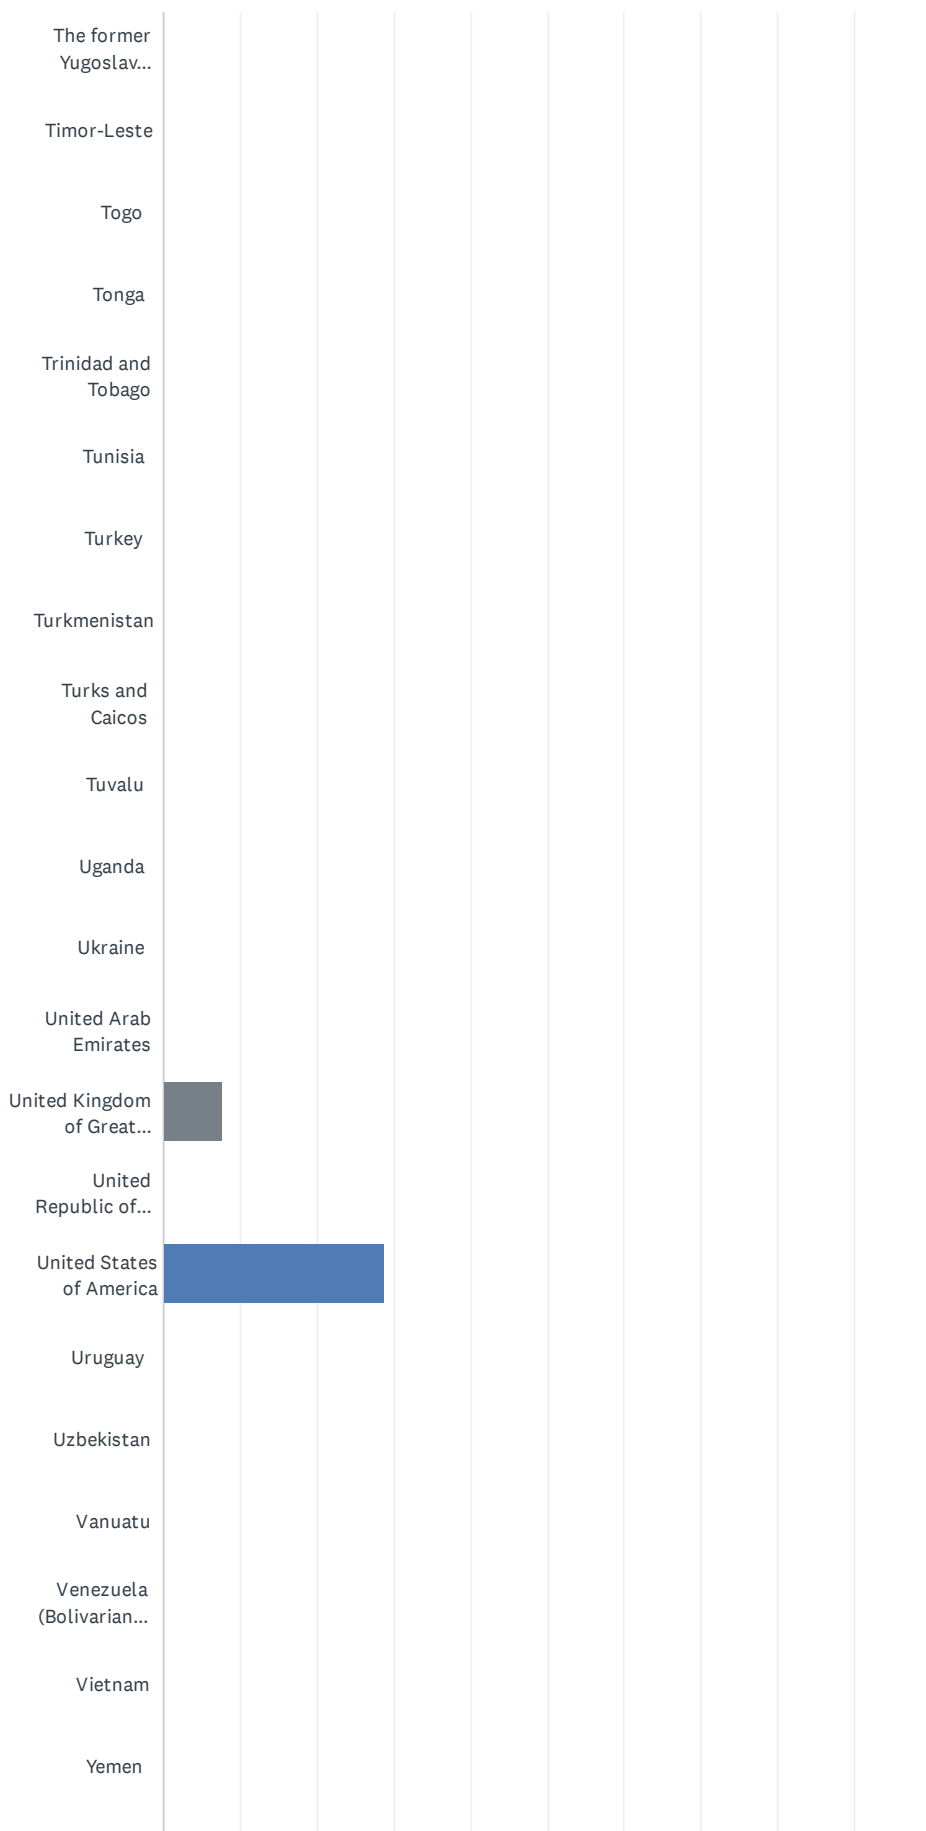

Mechanical ventilation during Extracorporeal Membrane Oxygenation

SurveyMonkey

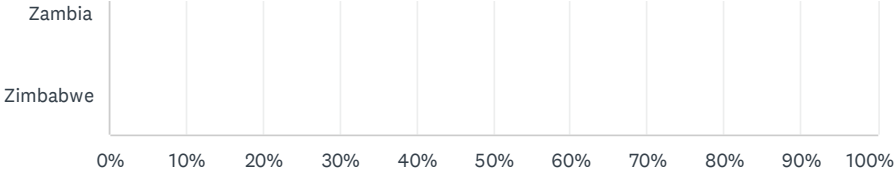

## Mechanical ventilation during Extracorporeal Membrane Oxygenation

SurveyMonkey

| ANSWER CHOICES                   | RESPONSES |   |
|----------------------------------|-----------|---|
| Afghanistan                      | 0.00%     | 0 |
| Albania                          | 0.00%     | 0 |
| Algeria                          | 0.00%     | 0 |
| Andorra                          | 0.00%     | 0 |
| Angola                           | 0.00%     | 0 |
| Anguilla                         | 0.00%     | 0 |
| Antigua and Barbuda              | 0.00%     | 0 |
| Argentina                        | 0.00%     | 0 |
| Armenia                          | 0.00%     | 0 |
| Australia                        | 7.69%     | 4 |
| Austria                          | 1.92%     | 1 |
| Azerbaijan                       | 0.00%     | 0 |
| Bahamas                          | 0.00%     | 0 |
| Bahrain                          | 0.00%     | 0 |
| Bangladesh                       | 0.00%     | 0 |
| Barbados                         | 0.00%     | 0 |
| Belarus                          | 0.00%     | 0 |
| Belgium                          | 7.69%     | 4 |
| Belize                           | 0.00%     | 0 |
| Benin                            | 0.00%     | 0 |
| Bhutan                           | 0.00%     | 0 |
| Bolivia (Plurinational State of) | 0.00%     | 0 |
| Bosnia and Herzegovina           | 0.00%     | 0 |
| Botswana                         | 0.00%     | 0 |
| Brazil                           | 0.00%     | 0 |
| British Virgin Island            | 0.00%     | 0 |
| Brunei Darussalam                | 0.00%     | 0 |
| Bulgaria                         | 0.00%     | 0 |
| Burkina Faso                     | 0.00%     | 0 |
| Burundi                          | 0.00%     | 0 |
| Cabo Verde                       | 0.00%     | 0 |
| Cambodia                         | 0.00%     | 0 |
| Cameroon                         | 0.00%     | 0 |
| Canada                           | 0.00%     | 0 |
| Cayman Islands                   | 0.00%     | 0 |

Mechanical ventilation during Extracorporeal Membrane Oxygenation

SurveyMonkey

|                                       |       |   |
|---------------------------------------|-------|---|
| Central African Republic              | 0.00% | 0 |
| Chad                                  | 0.00% | 0 |
| Chile                                 | 0.00% | 0 |
| China                                 | 0.00% | 0 |
| Colombia                              | 0.00% | 0 |
| Comoros                               | 0.00% | 0 |
| Congo                                 | 0.00% | 0 |
| Costa Rica                            | 0.00% | 0 |
| Côte D'Ivoire                         | 0.00% | 0 |
| Croatia                               | 0.00% | 0 |
| Cuba                                  | 0.00% | 0 |
| Cyprus                                | 0.00% | 0 |
| Czech Republic                        | 1.92% | 1 |
| Democratic People's Republic of Korea | 0.00% | 0 |
| Democratic Republic of the Congo      | 0.00% | 0 |
| Denmark                               | 0.00% | 0 |
| Djibouti                              | 0.00% | 0 |
| Dominica                              | 0.00% | 0 |
| Dominican Republic                    | 0.00% | 0 |
| Ecuador                               | 0.00% | 0 |
| Egypt                                 | 0.00% | 0 |
| El Salvador                           | 0.00% | 0 |
| Equatorial Guinea                     | 0.00% | 0 |
| Eritrea                               | 0.00% | 0 |
| Estonia                               | 0.00% | 0 |
| Ethiopia                              | 0.00% | 0 |
| Fiji                                  | 0.00% | 0 |
| Finland                               | 0.00% | 0 |
| France                                | 1.92% | 1 |
| Gabon                                 | 0.00% | 0 |
| Gambia                                | 0.00% | 0 |
| Georgia                               | 0.00% | 0 |
| Germany                               | 1.92% | 1 |
| Ghana                                 | 0.00% | 0 |
| Greece                                | 0.00% | 0 |
| Grenada                               | 0.00% | 0 |

## Mechanical ventilation during Extracorporeal Membrane Oxygenation

SurveyMonkey

|                                  |       |   |
|----------------------------------|-------|---|
| Guatemala                        | 0.00% | 0 |
| Guinea                           | 0.00% | 0 |
| Guinea Bissau                    | 0.00% | 0 |
| Guyana                           | 0.00% | 0 |
| Haiti                            | 0.00% | 0 |
| Holy See                         | 0.00% | 0 |
| Honduras                         | 0.00% | 0 |
| Hungary                          | 0.00% | 0 |
| Iceland                          | 0.00% | 0 |
| India                            | 0.00% | 0 |
| Indonesia                        | 0.00% | 0 |
| Iran (Islamic Republic of)       | 0.00% | 0 |
| Iraq                             | 0.00% | 0 |
| Ireland                          | 0.00% | 0 |
| Israel                           | 1.92% | 1 |
| Italy                            | 1.92% | 1 |
| Jamaica                          | 0.00% | 0 |
| Japan                            | 0.00% | 0 |
| Jordan                           | 0.00% | 0 |
| Kazakhstan                       | 0.00% | 0 |
| Kenya                            | 0.00% | 0 |
| Kiribati                         | 0.00% | 0 |
| Kuwait                           | 0.00% | 0 |
| Kyrgyzstan                       | 0.00% | 0 |
| Lao People's Democratic Republic | 0.00% | 0 |
| Latvia                           | 0.00% | 0 |
| Lebanon                          | 0.00% | 0 |
| Lesotho                          | 0.00% | 0 |
| Liberia                          | 0.00% | 0 |
| Libya                            | 0.00% | 0 |
| Liechtenstein                    | 0.00% | 0 |
| Lithuania                        | 0.00% | 0 |
| Luxembourg                       | 0.00% | 0 |
| Madagascar                       | 0.00% | 0 |
| Malawi                           | 0.00% | 0 |
| Malaysia                         | 0.00% | 0 |

## Mechanical ventilation during Extracorporeal Membrane Oxygenation

SurveyMonkey

|                                  |        |   |
|----------------------------------|--------|---|
| Maldives                         | 0.00%  | 0 |
| Mali                             | 0.00%  | 0 |
| Malta                            | 0.00%  | 0 |
| Marshall Islands                 | 0.00%  | 0 |
| Mauritania                       | 0.00%  | 0 |
| Mauritius                        | 0.00%  | 0 |
| Mexico                           | 0.00%  | 0 |
| Micronesia (Federated States of) | 0.00%  | 0 |
| Monaco                           | 0.00%  | 0 |
| Mongolia                         | 0.00%  | 0 |
| Montenegro                       | 0.00%  | 0 |
| Montserrat                       | 0.00%  | 0 |
| Morocco                          | 0.00%  | 0 |
| Mozambique                       | 0.00%  | 0 |
| Myanmar                          | 0.00%  | 0 |
| Namibia                          | 0.00%  | 0 |
| Nauru                            | 0.00%  | 0 |
| Nepal                            | 0.00%  | 0 |
| Netherlands                      | 17.31% | 9 |
| New Zealand                      | 3.85%  | 2 |
| Nicaragua                        | 0.00%  | 0 |
| Niger                            | 0.00%  | 0 |
| Nigeria                          | 0.00%  | 0 |
| Norway                           | 0.00%  | 0 |
| Oman                             | 0.00%  | 0 |
| Pakistan                         | 0.00%  | 0 |
| Palau                            | 0.00%  | 0 |
| Panama                           | 0.00%  | 0 |
| Papua New Guinea                 | 0.00%  | 0 |
| Paraguay                         | 0.00%  | 0 |
| Peru                             | 0.00%  | 0 |
| Philippines                      | 0.00%  | 0 |
| Poland                           | 0.00%  | 0 |
| Portugal                         | 1.92%  | 1 |
| Qatar                            | 0.00%  | 0 |



Mechanical ventilation during Extracorporeal Membrane Oxygenation

SurveyMonkey

|                                           |       |   |
|-------------------------------------------|-------|---|
| Republic of Korea                         | 0.00% | 0 |
| Republic of Moldova                       | 0.00% | 0 |
| Romania                                   | 0.00% | 0 |
| Russian Federation                        | 0.00% | 0 |
| Rwanda                                    | 0.00% | 0 |
| Saint Kitts and Nevis                     | 0.00% | 0 |
| Saint Lucia                               | 0.00% | 0 |
| Saint Vincent and the Grenadines          | 0.00% | 0 |
| Samoa                                     | 0.00% | 0 |
| San Marino                                | 0.00% | 0 |
| Sao Tome and Principe                     | 0.00% | 0 |
| Saudi Arabia                              | 0.00% | 0 |
| Senegal                                   | 0.00% | 0 |
| Serbia                                    | 1.92% | 1 |
| Seychelles                                | 0.00% | 0 |
| Sierra Leone                              | 0.00% | 0 |
| Singapore                                 | 0.00% | 0 |
| Slovakia                                  | 0.00% | 0 |
| Slovenia                                  | 1.92% | 1 |
| Solomon Islands                           | 0.00% | 0 |
| Somalia                                   | 0.00% | 0 |
| South Africa                              | 0.00% | 0 |
| South Sudan                               | 0.00% | 0 |
| Spain                                     | 3.85% | 2 |
| Sri Lanka                                 | 0.00% | 0 |
| State of Palestine                        | 0.00% | 0 |
| Sudan                                     | 0.00% | 0 |
| Suriname                                  | 0.00% | 0 |
| Swaziland                                 | 0.00% | 0 |
| Sweden                                    | 1.92% | 1 |
| Switzerland                               | 3.85% | 2 |
| Syrian Arab Republic                      | 0.00% | 0 |
| Tajikistan                                | 0.00% | 0 |
| Thailand                                  | 0.00% | 0 |
| The former Yugoslav Republic of Macedonia | 0.00% | 0 |
| Timor-Leste                               | 0.00% | 0 |

## Mechanical ventilation during Extracorporeal Membrane Oxygenation

SurveyMonkey

|                                                      |        |           |
|------------------------------------------------------|--------|-----------|
| Togo                                                 | 0.00%  | 0         |
| Tonga                                                | 0.00%  | 0         |
| Trinidad and Tobago                                  | 0.00%  | 0         |
| Tunisia                                              | 0.00%  | 0         |
| Turkey                                               | 0.00%  | 0         |
| Turkmenistan                                         | 0.00%  | 0         |
| Turks and Caicos                                     | 0.00%  | 0         |
| Tuvalu                                               | 0.00%  | 0         |
| Uganda                                               | 0.00%  | 0         |
| Ukraine                                              | 0.00%  | 0         |
| United Arab Emirates                                 | 0.00%  | 0         |
| United Kingdom of Great Britain and Northern Ireland | 7.69%  | 4         |
| United Republic of Tanzania                          | 0.00%  | 0         |
| United States of America                             | 28.85% | 15        |
| Uruguay                                              | 0.00%  | 0         |
| Uzbekistan                                           | 0.00%  | 0         |
| Vanuatu                                              | 0.00%  | 0         |
| Venezuela (Bolivarian Republic of)                   | 0.00%  | 0         |
| Vietnam                                              | 0.00%  | 0         |
| Yemen                                                | 0.00%  | 0         |
| Zambia                                               | 0.00%  | 0         |
| Zimbabwe                                             | 0.00%  | 0         |
| <b>TOTAL</b>                                         |        | <b>52</b> |

## Q4 In which center do you currently practice? (optional)

Answered: 41 Skipped: 11

| #  | RESPONSES                                                | DATE                |
|----|----------------------------------------------------------|---------------------|
| 1  | University Medical Centre Maribor                        | 10/20/2022 10:55 AM |
| 2  | Hadassah University Medical Center                       | 10/13/2022 4:39 PM  |
| 3  | Hospital Universitario Rio Hortega                       | 10/13/2022 11:29 AM |
| 4  | UMC Utrecht                                              | 10/12/2022 8:28 PM  |
| 5  | The Prince Charles hospital                              | 10/10/2022 1:48 AM  |
| 6  | Intermountain                                            | 10/8/2022 1:11 AM   |
| 7  | Maria Middelaes                                          | 10/7/2022 5:05 PM   |
| 8  | Swedish Medical Center                                   | 10/7/2022 4:04 PM   |
| 9  | University of Missouri                                   | 10/7/2022 1:37 PM   |
| 10 | King's College Hospital                                  | 10/7/2022 12:46 PM  |
| 11 | Institute for pulmonary diseases of Vojvodina            | 10/7/2022 10:50 AM  |
| 12 | LUMC                                                     | 10/5/2022 9:11 PM   |
| 13 | erasmus MC                                               | 10/5/2022 5:25 PM   |
| 14 | Radboudumc                                               | 10/5/2022 4:33 PM   |
| 15 | Hagaziekenhuis                                           | 10/5/2022 4:20 PM   |
| 16 | Upstate University Hospital                              | 9/23/2022 10:15 PM  |
| 17 | Golden Jubilee National Hospital                         | 9/23/2022 2:40 PM   |
| 18 | Lund University Hospital                                 | 9/21/2022 11:41 AM  |
| 19 | Leicester                                                | 9/21/2022 10:19 AM  |
| 20 | Ghent University Hospital                                | 9/20/2022 7:05 PM   |
| 21 | St Vincent's Sydney                                      | 9/20/2022 6:36 AM   |
| 22 | Lutheran Hospital                                        | 9/20/2022 1:34 AM   |
| 23 | flinders medical centre                                  | 9/19/2022 4:20 AM   |
| 24 | ALVARO CUNQUEIRO HOSPITAL. VIGO                          | 9/15/2022 1:49 PM   |
| 25 | LUMC                                                     | 9/15/2022 10:28 AM  |
| 26 | HELIOS Klinikum                                          | 9/15/2022 10:12 AM  |
| 27 | MUMC+                                                    | 9/15/2022 8:53 AM   |
| 28 | Auckland                                                 | 9/14/2022 9:34 PM   |
| 29 | Louisiana State University Shreveport                    | 9/14/2022 6:26 PM   |
| 30 | Swedish Medical Center                                   | 9/14/2022 5:37 PM   |
| 31 | General Hospital of Vienna, Medical University of Vienna | 9/14/2022 2:21 PM   |
| 32 | UF                                                       | 9/14/2022 12:57 PM  |
| 33 | EpiCURA HORNU                                            | 9/14/2022 12:37 PM  |
| 34 | CHLN ELSO 264                                            | 9/14/2022 12:28 PM  |
| 35 | Dunedin                                                  | 9/14/2022 12:14 PM  |

Mechanical ventilation during Extracorporeal Membrane Oxygenation

SurveyMonkey

|    |                                   |                    |
|----|-----------------------------------|--------------------|
| 36 | University Hospital of Pisa       | 9/14/2022 12:07 PM |
| 37 | Radboud University Medical Centre | 9/14/2022 11:46 AM |
| 38 | University Hospital Brussel       | 9/14/2022 11:21 AM |
| 39 | Ostrava                           | 9/14/2022 11:20 AM |
| 40 | Amiens                            | 9/14/2022 11:16 AM |
| 41 | Geneva University Hospitals       | 9/14/2022 11:15 AM |

### Q5 Do you have an explicit ventilation protocol for patients supported on ECMO?

Answered: 52 Skipped: 0

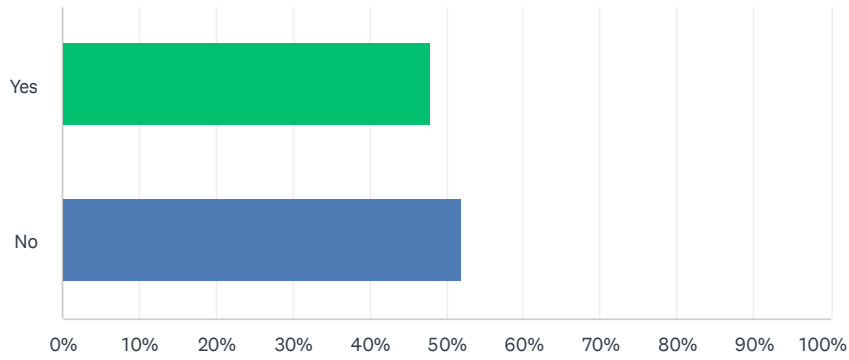

| ANSWER CHOICES | RESPONSES |    |
|----------------|-----------|----|
| Yes            | 48.08%    | 25 |
| No             | 51.92%    | 27 |
| TOTAL          |           | 52 |

### Q6 May we contact you so that you can send us this protocol?

Answered: 23 Skipped: 29

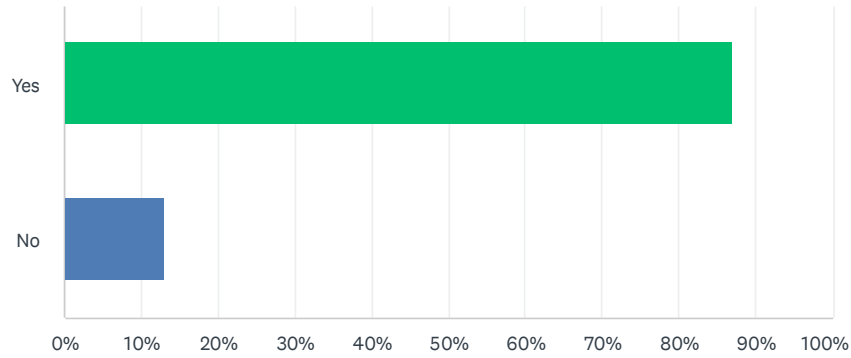

| ANSWER CHOICES | RESPONSES |           |
|----------------|-----------|-----------|
| Yes            | 86.96%    | 20        |
| No             | 13.04%    | 3         |
| <b>TOTAL</b>   |           | <b>23</b> |

### Q8 How many adult V-V ECMO cases per annum?

Answered: 47 Skipped: 5

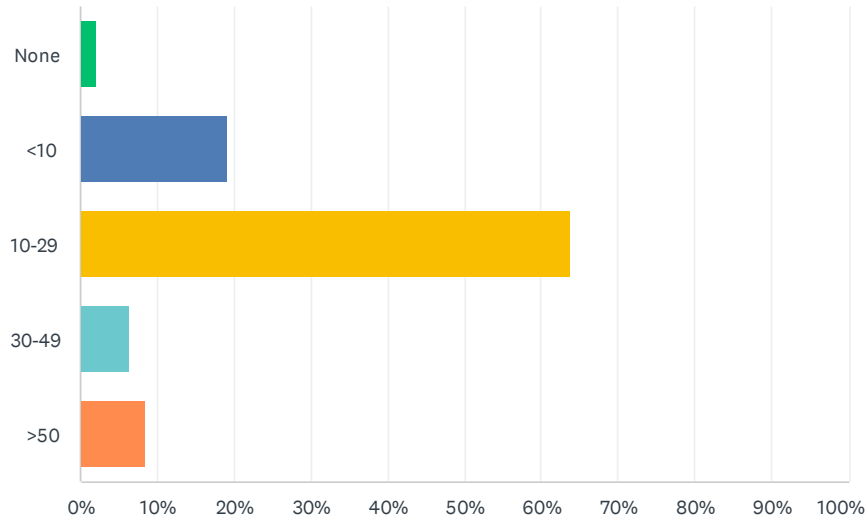

| ANSWER CHOICES | RESPONSES |           |
|----------------|-----------|-----------|
| None           | 2.13%     | 1         |
| <10            | 19.15%    | 9         |
| 10-29          | 63.83%    | 30        |
| 30-49          | 6.38%     | 3         |
| >50            | 8.51%     | 4         |
| <b>TOTAL</b>   |           | <b>47</b> |

### Q9 Which ventilator settings do you preferably/routinely use as the initial primary mode during V-V ECMO support assuming that V-V ECMO on itself is adequate for both oxygenation and ventilation?

Answered: 43 Skipped: 9

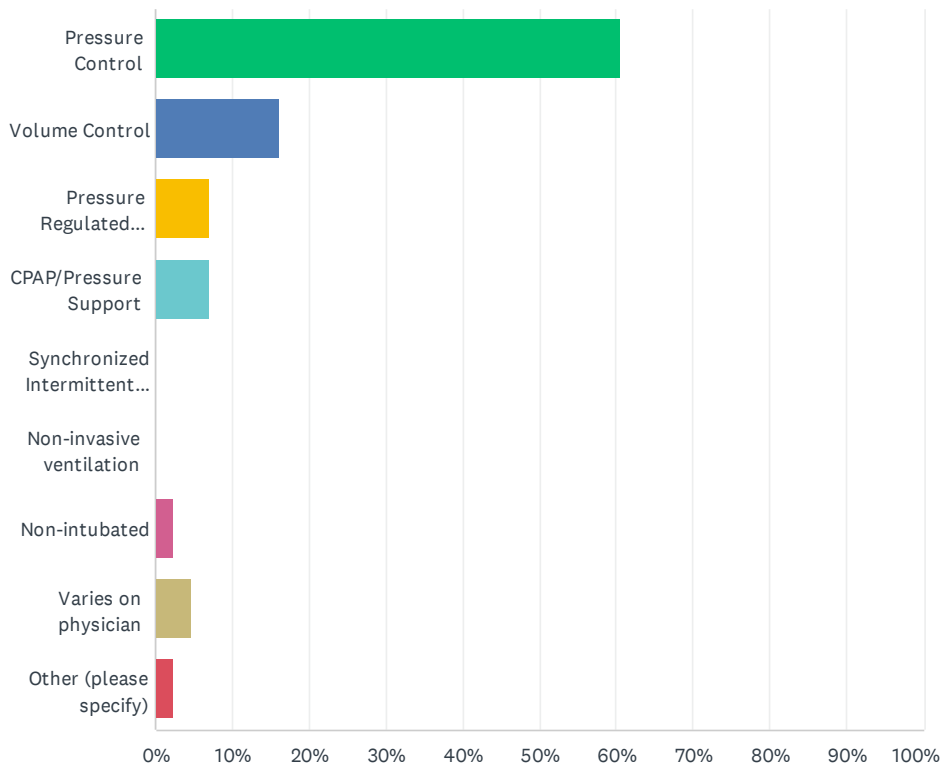

| ANSWER CHOICES                                  | RESPONSES |
|-------------------------------------------------|-----------|
| Pressure Control                                | 60.47% 26 |
| Volume Control                                  | 16.28% 7  |
| Pressure Regulated Volume Control               | 6.98% 3   |
| CPAP/Pressure Support                           | 6.98% 3   |
| Synchronized Intermittent Mandatory Ventilation | 0.00% 0   |
| Non-invasive ventilation                        | 0.00% 0   |
| Non-intubated                                   | 2.33% 1   |
| Varies on physician                             | 4.65% 2   |
| Other (please specify)                          | 2.33% 1   |
| <b>TOTAL</b>                                    | <b>43</b> |

| # | OTHER (PLEASE SPECIFY)     | DATE              |
|---|----------------------------|-------------------|
| 1 | APRV using the TCAV method | 9/14/2022 1:02 PM |



## Q10 What are your initial mechanical ventilation settings assuming that V-V ECMO on itself is adequate for both oxygenation and ventilation?

Answered: 41 Skipped: 11

| ANSWER CHOICES          | RESPONSES |    |
|-------------------------|-----------|----|
| PEEP cm H2O             | 100.00%   | 41 |
| Driving pressure cm H2O | 87.80%    | 36 |
| Plateau pressure cm H2O | 82.93%    | 34 |
| Tidal volume ml/kg      | 80.49%    | 33 |
| Respiratory rate/min    | 97.56%    | 40 |

| #  | PEEP CM H2O                                                                                            | DATE                |
|----|--------------------------------------------------------------------------------------------------------|---------------------|
| 1  | Optimal PEEP assessment (either via transesophageal pressure monitoring or via P/V loop determination) | 10/20/2022 10:58 AM |
| 2  | 10                                                                                                     | 10/13/2022 4:42 PM  |
| 3  | 10-12                                                                                                  | 10/13/2022 3:47 PM  |
| 4  | 10-15                                                                                                  | 10/13/2022 11:31 AM |
| 5  | 10                                                                                                     | 10/13/2022 11:17 AM |
| 6  | 10                                                                                                     | 10/8/2022 1:13 AM   |
| 7  | 8                                                                                                      | 10/7/2022 5:08 PM   |
| 8  | 12                                                                                                     | 10/7/2022 12:49 PM  |
| 9  | usually 8-12, depending on the oxygenation and hemodynamis                                             | 10/7/2022 10:52 AM  |
| 10 | will depend on recruitebility preECMO                                                                  | 10/5/2022 9:17 PM   |
| 11 | 10-15                                                                                                  | 10/5/2022 5:34 PM   |
| 12 | 8                                                                                                      | 10/5/2022 4:36 PM   |
| 13 | 5                                                                                                      | 10/5/2022 4:22 PM   |
| 14 | 10-15                                                                                                  | 9/27/2022 2:05 PM   |
| 15 | 10                                                                                                     | 9/23/2022 10:17 PM  |
| 16 | 10-15                                                                                                  | 9/21/2022 11:43 AM  |
| 17 | 10-15                                                                                                  | 9/21/2022 10:21 AM  |
| 18 | 10                                                                                                     | 9/20/2022 7:08 PM   |
| 19 | 10-15                                                                                                  | 9/20/2022 6:38 AM   |
| 20 | 10                                                                                                     | 9/19/2022 4:22 AM   |
| 21 | 10                                                                                                     | 9/15/2022 12:21 PM  |
| 22 | titrated on esophageal pressures, otherwise pre ECMO PEEP                                              | 9/15/2022 10:34 AM  |
| 23 | 8 - 12                                                                                                 | 9/15/2022 10:19 AM  |
| 24 | 10                                                                                                     | 9/15/2022 8:55 AM   |
| 25 | 10                                                                                                     | 9/14/2022 10:21 PM  |
| 26 | 10                                                                                                     | 9/14/2022 9:36 PM   |
| 27 | 10-12                                                                                                  | 9/14/2022 8:02 PM   |

## Mechanical ventilation during Extracorporeal Membrane Oxygenation

SurveyMonkey

| 28 | 10-12                                                              | 9/14/2022 6:29 PM   |
|----|--------------------------------------------------------------------|---------------------|
| 29 | 10                                                                 | 9/14/2022 5:14 PM   |
| 30 | 5                                                                  | 9/14/2022 3:44 PM   |
| 31 | depends on compliance or pleural pressure measurement              | 9/14/2022 2:24 PM   |
| 32 | 10                                                                 | 9/14/2022 12:40 PM  |
| 33 | 10-14                                                              | 9/14/2022 12:31 PM  |
| 34 | 10                                                                 | 9/14/2022 12:18 PM  |
| 35 | 10                                                                 | 9/14/2022 12:09 PM  |
| 36 | 10 - 14 depending on EE pleural pressure                           | 9/14/2022 11:50 AM  |
| 37 | 5-10                                                               | 9/14/2022 11:46 AM  |
| 38 | 10                                                                 | 9/14/2022 11:23 AM  |
| 39 | 10                                                                 | 9/14/2022 11:22 AM  |
| 40 | 10                                                                 | 9/14/2022 11:18 AM  |
| 41 | >10                                                                | 9/14/2022 11:18 AM  |
| #  | DRIVING PRESSURE CM H2O                                            | DATE                |
| 1  | Below 10 cm                                                        | 10/20/2022 10:58 AM |
| 2  | 10                                                                 | 10/13/2022 11:31 AM |
| 3  | 10                                                                 | 10/13/2022 11:17 AM |
| 4  | 15                                                                 | 10/8/2022 1:13 AM   |
| 5  | 8                                                                  | 10/7/2022 12:49 PM  |
| 6  | below 15                                                           | 10/7/2022 10:52 AM  |
| 7  | transpulmonary <10                                                 | 10/5/2022 9:17 PM   |
| 8  | <15                                                                | 10/5/2022 4:36 PM   |
| 9  | 5                                                                  | 10/5/2022 4:22 PM   |
| 10 | 10                                                                 | 9/27/2022 2:05 PM   |
| 11 | 10-15                                                              | 9/21/2022 11:43 AM  |
| 12 | 10-15                                                              | 9/21/2022 10:21 AM  |
| 13 | 10                                                                 | 9/20/2022 7:08 PM   |
| 14 | 10                                                                 | 9/20/2022 6:38 AM   |
| 15 | 10                                                                 | 9/19/2022 4:22 AM   |
| 16 | 10                                                                 | 9/15/2022 12:21 PM  |
| 17 | <14 (in case of esophageal balloon transpulm driving pressure <10) | 9/15/2022 10:34 AM  |
| 18 | 10 - 14                                                            | 9/15/2022 10:19 AM  |
| 19 | <15                                                                | 9/15/2022 8:55 AM   |
| 20 | 10                                                                 | 9/14/2022 10:21 PM  |
| 21 | 10                                                                 | 9/14/2022 9:36 PM   |
| 22 | 10-15                                                              | 9/14/2022 8:02 PM   |
| 23 | 10-12                                                              | 9/14/2022 6:29 PM   |
| 24 | 10                                                                 | 9/14/2022 5:14 PM   |
| 25 | 10                                                                 | 9/14/2022 3:44 PM   |
| 26 | as low as possible                                                 | 9/14/2022 2:24 PM   |

Mechanical ventilation during Extracorporeal Membrane Oxygenation

SurveyMonkey

| 27 | 14                      | 9/14/2022 12:40 PM  |
|----|-------------------------|---------------------|
| 28 | 5-10                    | 9/14/2022 12:31 PM  |
| 29 | 10                      | 9/14/2022 12:18 PM  |
| 30 | 13                      | 9/14/2022 12:09 PM  |
| 31 | < 10                    | 9/14/2022 11:50 AM  |
| 32 | 5-10                    | 9/14/2022 11:46 AM  |
| 33 | 14                      | 9/14/2022 11:23 AM  |
| 34 | 10                      | 9/14/2022 11:22 AM  |
| 35 | 10                      | 9/14/2022 11:18 AM  |
| 36 | max 14                  | 9/14/2022 11:18 AM  |
| #  | PLATEAU PRESSURE CM H2O | DATE                |
| 1  | Below 25 cm             | 10/20/2022 10:58 AM |
| 2  | 20-25                   | 10/13/2022 11:31 AM |
| 3  | 20                      | 10/13/2022 11:17 AM |
| 4  | 25                      | 10/8/2022 1:13 AM   |
| 5  | 25                      | 10/7/2022 5:08 PM   |
| 6  | 20                      | 10/7/2022 12:49 PM  |
| 7  | below 30                | 10/7/2022 10:52 AM  |
| 8  | not specific            | 10/5/2022 9:17 PM   |
| 9  | <26                     | 10/5/2022 5:34 PM   |
| 10 | <28                     | 10/5/2022 4:36 PM   |
| 11 | 5                       | 10/5/2022 4:22 PM   |
| 12 | 20-25                   | 9/27/2022 2:05 PM   |
| 13 | 20-25                   | 9/21/2022 11:43 AM  |
| 14 | <30                     | 9/21/2022 10:21 AM  |
| 15 | 20                      | 9/20/2022 7:08 PM   |
| 16 | 20-25                   | 9/20/2022 6:38 AM   |
| 17 | 20                      | 9/15/2022 12:21 PM  |
| 18 | not mentioned           | 9/15/2022 10:34 AM  |
| 19 | <30                     | 9/14/2022 10:21 PM  |
| 20 | <25                     | 9/14/2022 8:02 PM   |
| 21 | 20-24                   | 9/14/2022 6:29 PM   |
| 22 | 20                      | 9/14/2022 5:14 PM   |
| 23 | 15                      | 9/14/2022 3:44 PM   |
| 24 | as low as possible      | 9/14/2022 2:24 PM   |
| 25 | 25                      | 9/14/2022 12:40 PM  |
| 26 | 20                      | 9/14/2022 12:31 PM  |
| 27 | 20                      | 9/14/2022 12:18 PM  |
| 28 | 20                      | 9/14/2022 12:09 PM  |
| 29 | < 20 - 24               | 9/14/2022 11:50 AM  |
| 30 | 20                      | 9/14/2022 11:46 AM  |

Mechanical ventilation during Extracorporeal Membrane Oxygenation

SurveyMonkey

| 31 | 24                                                                                          | 9/14/2022 11:23 AM  |
|----|---------------------------------------------------------------------------------------------|---------------------|
| 32 | 20                                                                                          | 9/14/2022 11:22 AM  |
| 33 | 20                                                                                          | 9/14/2022 11:18 AM  |
| 34 | max 25                                                                                      | 9/14/2022 11:18 AM  |
| #  | TIDAL VOLUME ML/KG                                                                          | DATE                |
| 1  | 150-250 ml (depending on lung compliance - pressure measurements: Ppl and Driving pressure) | 10/20/2022 10:58 AM |
| 2  | 4                                                                                           | 10/13/2022 4:42 PM  |
| 3  | 5-6                                                                                         | 10/13/2022 3:47 PM  |
| 4  | 4-6                                                                                         | 10/13/2022 11:17 AM |
| 5  | <6ml/kg                                                                                     | 10/8/2022 1:13 AM   |
| 6  | 6-8                                                                                         | 10/7/2022 5:08 PM   |
| 7  | 3                                                                                           | 10/7/2022 12:49 PM  |
| 8  | 4ml/kg                                                                                      | 10/7/2022 10:52 AM  |
| 9  | will depend on driving pressure, mostly 4-6ml/kg but could be lower                         | 10/5/2022 9:17 PM   |
| 10 | 4                                                                                           | 10/5/2022 5:34 PM   |
| 11 | 4 ml/kg                                                                                     | 10/5/2022 4:36 PM   |
| 12 | 3                                                                                           | 10/5/2022 4:22 PM   |
| 13 | 1-4                                                                                         | 9/27/2022 2:05 PM   |
| 14 | 4-6                                                                                         | 9/23/2022 10:17 PM  |
| 15 | Depends on compliance                                                                       | 9/21/2022 11:43 AM  |
| 16 | Ignore                                                                                      | 9/21/2022 10:21 AM  |
| 17 | up to 6                                                                                     | 9/20/2022 6:38 AM   |
| 18 | 4-6                                                                                         | 9/15/2022 10:34 AM  |
| 19 | 6                                                                                           | 9/15/2022 10:19 AM  |
| 20 | 2-4                                                                                         | 9/15/2022 8:55 AM   |
| 21 | typically < 4cc/kg IBW                                                                      | 9/14/2022 8:02 PM   |
| 22 | Not targeted                                                                                | 9/14/2022 6:29 PM   |
| 23 | 5-8                                                                                         | 9/14/2022 3:44 PM   |
| 24 | 3-4                                                                                         | 9/14/2022 2:24 PM   |
| 25 | 3                                                                                           | 9/14/2022 12:40 PM  |
| 26 | 2-4                                                                                         | 9/14/2022 12:31 PM  |
| 27 | 5-6                                                                                         | 9/14/2022 12:18 PM  |
| 28 | 6                                                                                           | 9/14/2022 12:09 PM  |
| 29 | 4                                                                                           | 9/14/2022 11:50 AM  |
| 30 | 3-4ml/kg                                                                                    | 9/14/2022 11:46 AM  |
| 31 | 4                                                                                           | 9/14/2022 11:23 AM  |
| 32 | 3                                                                                           | 9/14/2022 11:18 AM  |
| 33 | 4                                                                                           | 9/14/2022 11:18 AM  |
| #  | RESPIRATORY RATE/MIN                                                                        | DATE                |
| 1  | 12-16/min                                                                                   | 10/20/2022 10:58 AM |
| 2  | 10                                                                                          | 10/13/2022 4:42 PM  |

## Mechanical ventilation during Extracorporeal Membrane Oxygenation

SurveyMonkey

|    |             |                     |
|----|-------------|---------------------|
| 3  | 10-15       | 10/13/2022 3:47 PM  |
| 4  | 10          | 10/13/2022 11:31 AM |
| 5  | 10          | 10/13/2022 11:17 AM |
| 6  | 14          | 10/8/2022 1:13 AM   |
| 7  | 12          | 10/7/2022 5:08 PM   |
| 8  | 12          | 10/7/2022 12:49 PM  |
| 9  | 10-15       | 10/7/2022 10:52 AM  |
| 10 | 20/min      | 10/5/2022 9:17 PM   |
| 11 | 10-20       | 10/5/2022 5:34 PM   |
| 12 | 10          | 10/5/2022 4:36 PM   |
| 13 | 12          | 10/5/2022 4:22 PM   |
| 14 | 10-20       | 9/27/2022 2:05 PM   |
| 15 | 10          | 9/23/2022 10:17 PM  |
| 16 | 15          | 9/21/2022 11:43 AM  |
| 17 | 10          | 9/21/2022 10:21 AM  |
| 18 | 10          | 9/20/2022 7:08 PM   |
| 19 | 10          | 9/20/2022 6:38 AM   |
| 20 | 6           | 9/19/2022 4:22 AM   |
| 21 | 10          | 9/15/2022 12:21 PM  |
| 22 | 14          | 9/15/2022 10:34 AM  |
| 23 | 8 - 12      | 9/15/2022 10:19 AM  |
| 24 | 10-15       | 9/15/2022 8:55 AM   |
| 25 | ~10         | 9/14/2022 10:21 PM  |
| 26 | 10          | 9/14/2022 8:02 PM   |
| 27 | Spontaneous | 9/14/2022 6:29 PM   |
| 28 | 10          | 9/14/2022 5:14 PM   |
| 29 | 10          | 9/14/2022 3:44 PM   |
| 30 | 8 - 12      | 9/14/2022 2:24 PM   |
| 31 | 10          | 9/14/2022 12:40 PM  |
| 32 | 12-14       | 9/14/2022 12:31 PM  |
| 33 | 10          | 9/14/2022 12:18 PM  |
| 34 | 20          | 9/14/2022 12:09 PM  |
| 35 | 10          | 9/14/2022 11:50 AM  |
| 36 | 15-20       | 9/14/2022 11:46 AM  |
| 37 | 10          | 9/14/2022 11:23 AM  |
| 38 | 10          | 9/14/2022 11:22 AM  |
| 39 | 10          | 9/14/2022 11:18 AM  |
| 40 | 10          | 9/14/2022 11:18 AM  |

### Q11 Which sedatives do you preferably use during V-V ECMO support (please provide and rank max 3, leave the other fields blank)?

Answered: 42 Skipped: 10

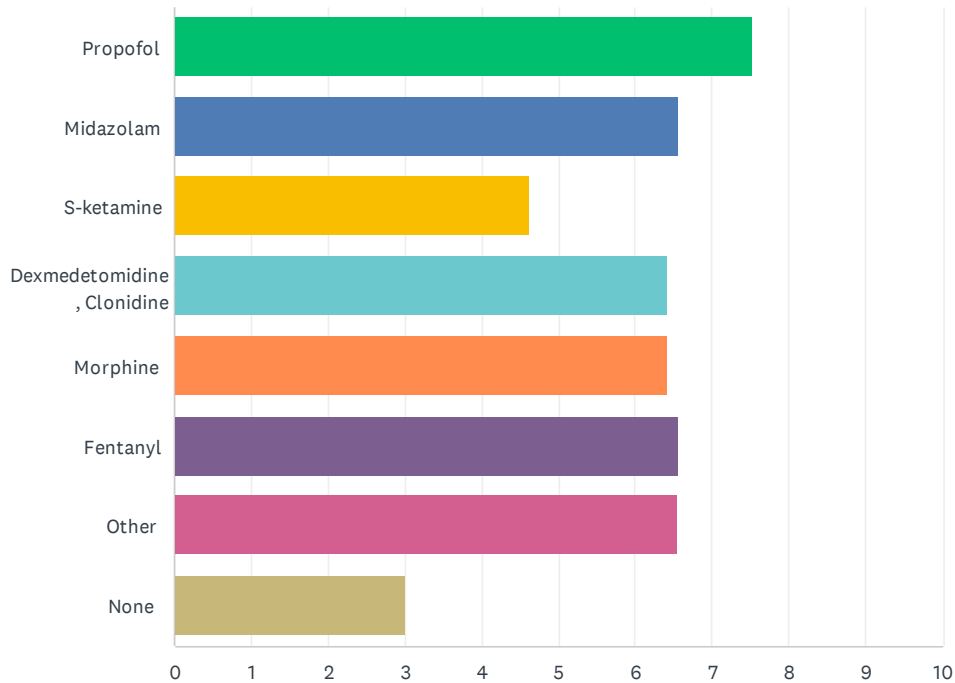

|                            | 1            | 2           | 3            | 4          | 5           | 6           | 7           | 8           | TOTAL | SCORE |
|----------------------------|--------------|-------------|--------------|------------|-------------|-------------|-------------|-------------|-------|-------|
| Propofol                   | 66.67%<br>22 | 27.27%<br>9 | 0.00%<br>0   | 3.03%<br>1 | 3.03%<br>1  | 0.00%<br>0  | 0.00%<br>0  | 0.00%<br>0  | 33    | 7.52  |
| Midazolam                  | 21.74%<br>5  | 21.74%<br>5 | 47.83%<br>11 | 8.70%<br>2 | 0.00%<br>0  | 0.00%<br>0  | 0.00%<br>0  | 0.00%<br>0  | 23    | 6.57  |
| S-ketamine                 | 0.00%<br>0   | 12.50%<br>1 | 37.50%<br>3  | 0.00%<br>0 | 12.50%<br>1 | 25.00%<br>2 | 12.50%<br>1 | 0.00%<br>0  | 8     | 4.63  |
| Dexmedetomidine, Clonidine | 22.73%<br>5  | 18.18%<br>4 | 50.00%<br>11 | 0.00%<br>0 | 4.55%<br>1  | 4.55%<br>1  | 0.00%<br>0  | 0.00%<br>0  | 22    | 6.41  |
| Morphine                   | 16.67%<br>2  | 50.00%<br>6 | 16.67%<br>2  | 8.33%<br>1 | 0.00%<br>0  | 0.00%<br>0  | 8.33%<br>1  | 0.00%<br>0  | 12    | 6.42  |
| Fentanyl                   | 16.67%<br>3  | 44.44%<br>8 | 27.78%<br>5  | 5.56%<br>1 | 0.00%<br>0  | 5.56%<br>1  | 0.00%<br>0  | 0.00%<br>0  | 18    | 6.56  |
| Other                      | 30.77%<br>4  | 38.46%<br>5 | 15.38%<br>2  | 0.00%<br>0 | 7.69%<br>1  | 0.00%<br>0  | 7.69%<br>1  | 0.00%<br>0  | 13    | 6.54  |
| None                       | 0.00%<br>0   | 33.33%<br>1 | 0.00%<br>0   | 0.00%<br>0 | 0.00%<br>0  | 0.00%<br>0  | 0.00%<br>0  | 66.67%<br>2 | 3     | 3.00  |

### Q12 For mechanical ventilation during V-V ECMO support, what do you consider the primary goal:

Answered: 43 Skipped: 9

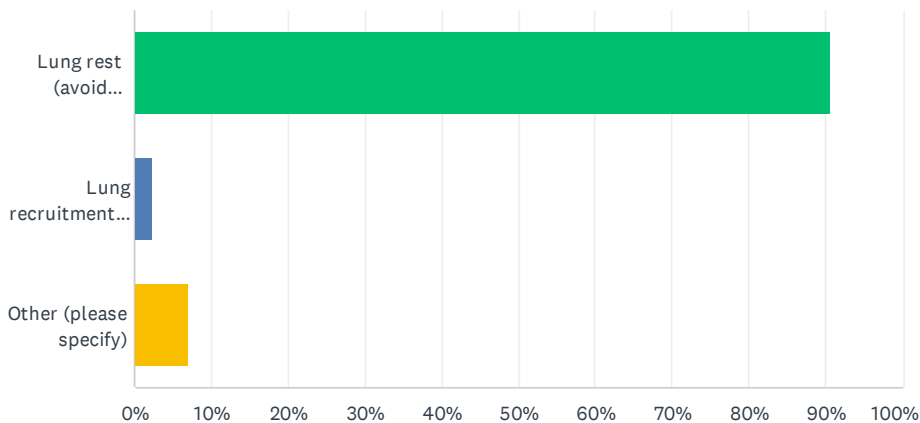

| ANSWER CHOICES                                   | RESPONSES |           |
|--------------------------------------------------|-----------|-----------|
| Lung rest (avoid ventilator-induced lung injury) | 90.70%    | 39        |
| Lung recruitment (opening the lung)              | 2.33%     | 1         |
| Other (please specify)                           | 6.98%     | 3         |
| <b>TOTAL</b>                                     |           | <b>43</b> |

| # | OTHER (PLEASE SPECIFY)                                                                     | DATE              |
|---|--------------------------------------------------------------------------------------------|-------------------|
| 1 | Relative lung rest while preventing collapse                                               | 10/5/2022 5:34 PM |
| 2 | Lung rest, but with some preserved pulmonary oxygenation                                   | 9/15/2022 8:55 AM |
| 3 | Stabilize the lung to prevent further injury then allow healing which includes recruitment | 9/14/2022 1:02 PM |

### Q13 Do you use respiratory rescue therapies during V-V ECMO support?

Answered: 43 Skipped: 9

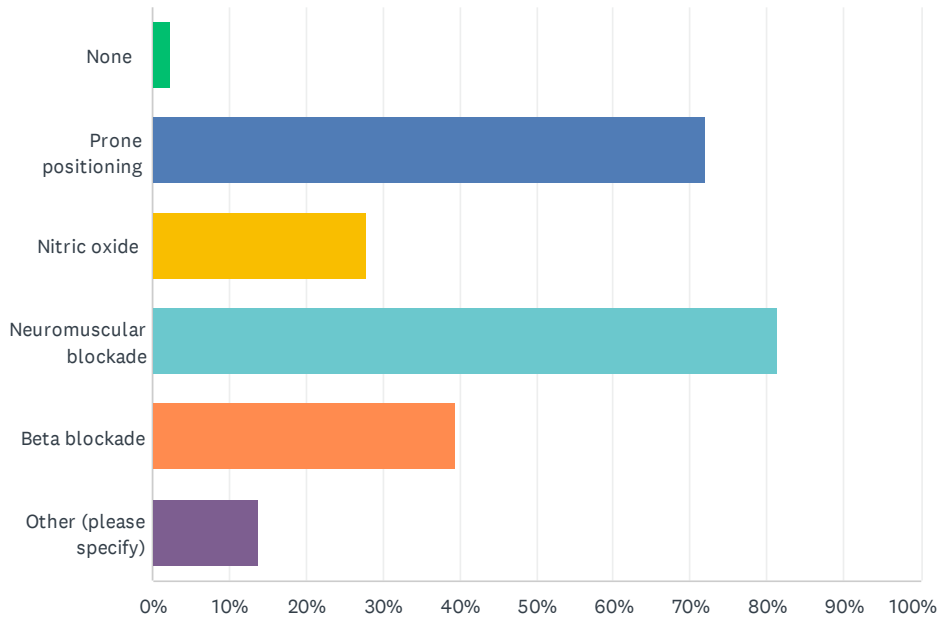

| ANSWER CHOICES         | RESPONSES |
|------------------------|-----------|
| None                   | 2.33% 1   |
| Prone positioning      | 72.09% 31 |
| Nitric oxide           | 27.91% 12 |
| Neuromuscular blockade | 81.40% 35 |
| Beta blockade          | 39.53% 17 |
| Other (please specify) | 13.95% 6  |
| Total Respondents: 43  |           |

| # | OTHER (PLEASE SPECIFY)                                                                                                                                                                                             | DATE                |
|---|--------------------------------------------------------------------------------------------------------------------------------------------------------------------------------------------------------------------|---------------------|
| 1 | very exceptionally NO and beta blockade                                                                                                                                                                            | 10/13/2022 11:17 AM |
| 2 | PGI2 nebulised                                                                                                                                                                                                     | 10/7/2022 12:49 PM  |
| 3 | Ilomedine ventilation                                                                                                                                                                                              | 10/5/2022 4:22 PM   |
| 4 | additional cannula                                                                                                                                                                                                 | 9/14/2022 10:21 PM  |
| 5 | Pseudo-Prone initially then upright with mobilization. Inhaled Flolan has typically been started as rescue for hypoxemia before ECMO initiated and we continue it for ~48 hours to assist recovery of RV function. | 9/14/2022 1:02 PM   |
| 6 | inhaled prostacyclin                                                                                                                                                                                               | 9/14/2022 11:50 AM  |



### Q14 Do you use neuromuscular blockade (NMB) during V-V ECMO support?

Answered: 43 Skipped: 9

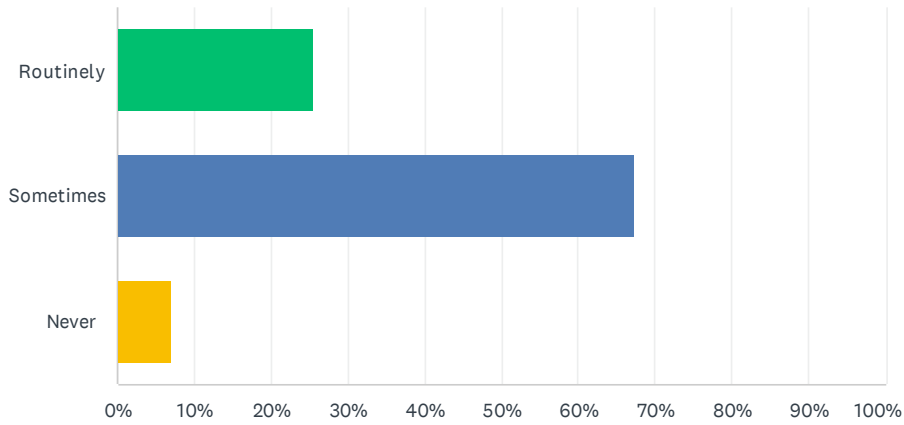

| ANSWER CHOICES | RESPONSES |    |
|----------------|-----------|----|
| Routinely      | 25.58%    | 11 |
| Sometimes      | 67.44%    | 29 |
| Never          | 6.98%     | 3  |
| TOTAL          |           | 43 |

### Q15 Do you use partial NMB in case of high tidal volumes in awake patients?

Answered: 39 Skipped: 13

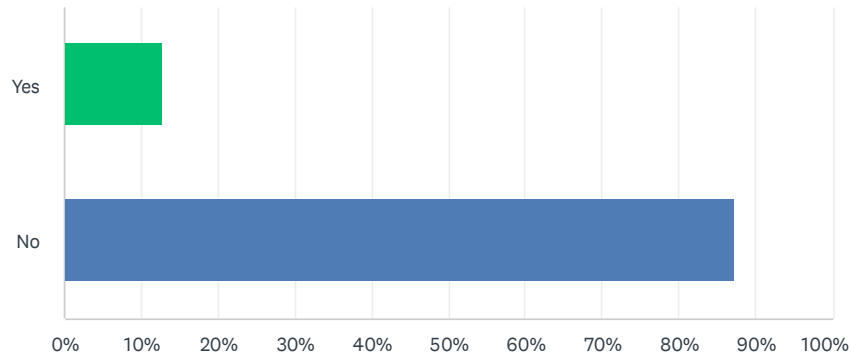

| ANSWER CHOICES | RESPONSES |    |
|----------------|-----------|----|
| Yes            | 12.82%    | 5  |
| No             | 87.18%    | 34 |
| TOTAL          |           | 39 |

### Q16 What is the main reason for you to consider stopping NMB during V-V ECMO?

Answered: 39 Skipped: 13

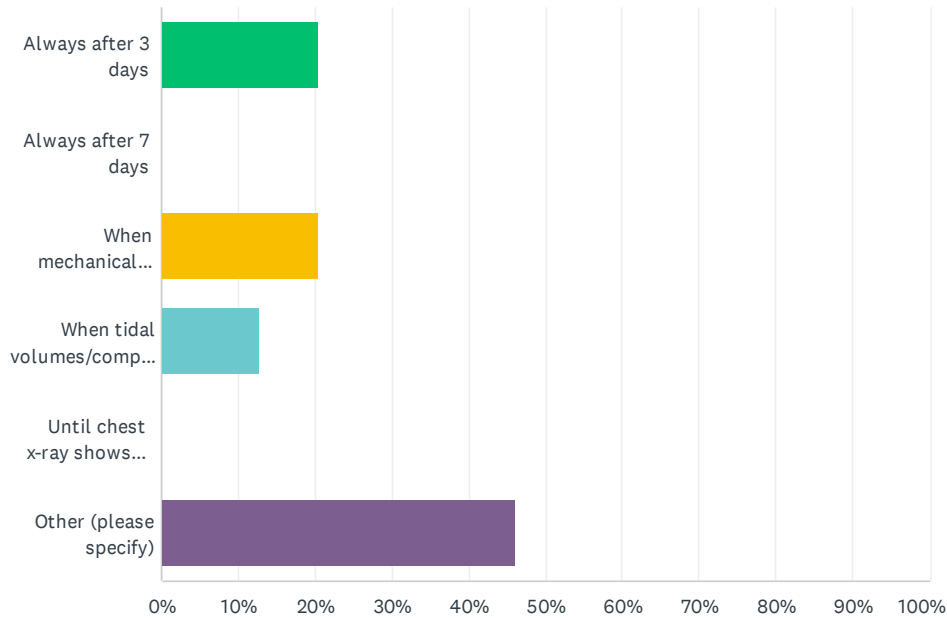

| ANSWER CHOICES                                 | RESPONSES |           |
|------------------------------------------------|-----------|-----------|
| Always after 3 days                            | 20.51%    | 8         |
| Always after 7 days                            | 0.00%     | 0         |
| When mechanical ventilation support diminishes | 20.51%    | 8         |
| When tidal volumes/compliance increase         | 12.82%    | 5         |
| Until chest x-ray shows improvement            | 0.00%     | 0         |
| Other (please specify)                         | 46.15%    | 18        |
| <b>TOTAL</b>                                   |           | <b>39</b> |

| # | OTHER (PLEASE SPECIFY)                                                                                                                              | DATE                |
|---|-----------------------------------------------------------------------------------------------------------------------------------------------------|---------------------|
| 1 | We consider it when nr. 4 and 5 occur (chest x-ray, shows improvement, lung compliance gets better and the initial cause of ARDS is under control). | 10/20/2022 11:01 AM |
| 2 | Short duration NMB for initial stabilization                                                                                                        | 10/13/2022 4:44 PM  |
| 3 | When the clinical condition (including settings of ECMO and mechanical ventilation) stabilizes                                                      | 10/13/2022 11:19 AM |
| 4 | when oxygenation improves                                                                                                                           | 10/7/2022 5:09 PM   |
| 5 | we use NBM intermitently, when needed, but we avoid continuous use after first 48h                                                                  | 10/7/2022 10:54 AM  |
| 6 | as soon as possible if deep sedation provides enough sedation to stop patients own respiratory effort                                               | 10/5/2022 9:19 PM   |
| 7 | stop unless persisting high resp drive                                                                                                              | 10/5/2022 5:36 PM   |
| 8 | as soon as possible                                                                                                                                 | 9/20/2022 7:09 PM   |

## Mechanical ventilation during Extracorporeal Membrane Oxygenation

SurveyMonkey

|    |                                                                                                            |                    |
|----|------------------------------------------------------------------------------------------------------------|--------------------|
| 9  | ASAP when spontaneous breathing is tolerated                                                               | 9/20/2022 6:39 AM  |
| 10 | reduced patient drive and effort                                                                           | 9/19/2022 4:23 AM  |
| 11 | we don't use NMB regularly                                                                                 | 9/15/2022 10:28 AM |
| 12 | Daily re-evaluation of necessity.                                                                          | 9/15/2022 8:56 AM  |
| 13 | as soon as possible with hypoxia improvement/better vent synchrony                                         | 9/14/2022 10:22 PM |
| 14 | when interference with circuit stops                                                                       | 9/14/2022 9:37 PM  |
| 15 | If we can adequately support the patient with VV ECMO flows and does not have severe ventilator asynchrony | 9/14/2022 8:05 PM  |
| 16 | wake patient and move/ambulate                                                                             | 9/14/2022 3:44 PM  |
| 17 | Clinical judgement                                                                                         | 9/14/2022 12:32 PM |
| 18 | Stop on a regular basis to see if NMB is still necessary                                                   | 9/14/2022 11:52 AM |

### Q17 What is the main reason for you to restart NMB during V-V ECMO?

Answered: 39 Skipped: 13

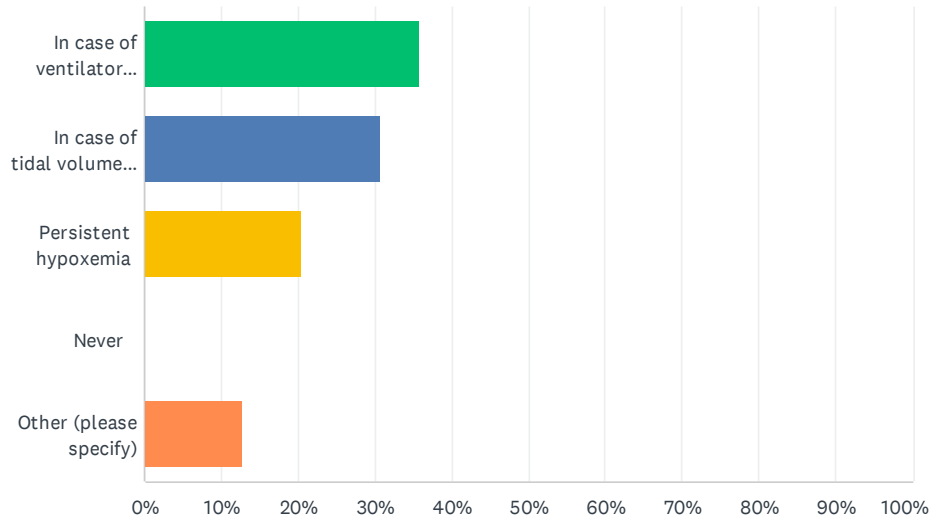

| ANSWER CHOICES                                                             | RESPONSES |
|----------------------------------------------------------------------------|-----------|
| In case of ventilator dyssynchrony                                         | 35.90% 14 |
| In case of tidal volumes >6ml/kg or Ppeak/Driving pressure at upper limits | 30.77% 12 |
| Persistent hypoxemia                                                       | 20.51% 8  |
| Never                                                                      | 0.00% 0   |
| Other (please specify)                                                     | 12.82% 5  |
| <b>TOTAL</b>                                                               | <b>39</b> |

| # | OTHER (PLEASE SPECIFY)                                                     | DATE               |
|---|----------------------------------------------------------------------------|--------------------|
| 1 | Onvoldoende met sedatie                                                    | 10/5/2022 4:37 PM  |
| 2 | we don't use NMB regularly                                                 | 9/15/2022 10:28 AM |
| 3 | Persistent hypoxemia when other rescue strategies have failed              | 9/15/2022 8:56 AM  |
| 4 | Lung protection                                                            | 9/14/2022 12:32 PM |
| 5 | Combination of high transpulmonary pressures and/or increased tidal volume | 9/14/2022 11:52 AM |

### Q18 What is the main reason for you to consider stopping sedatives and starting support ventilation during V-V ECMO?

Answered: 43 Skipped: 9

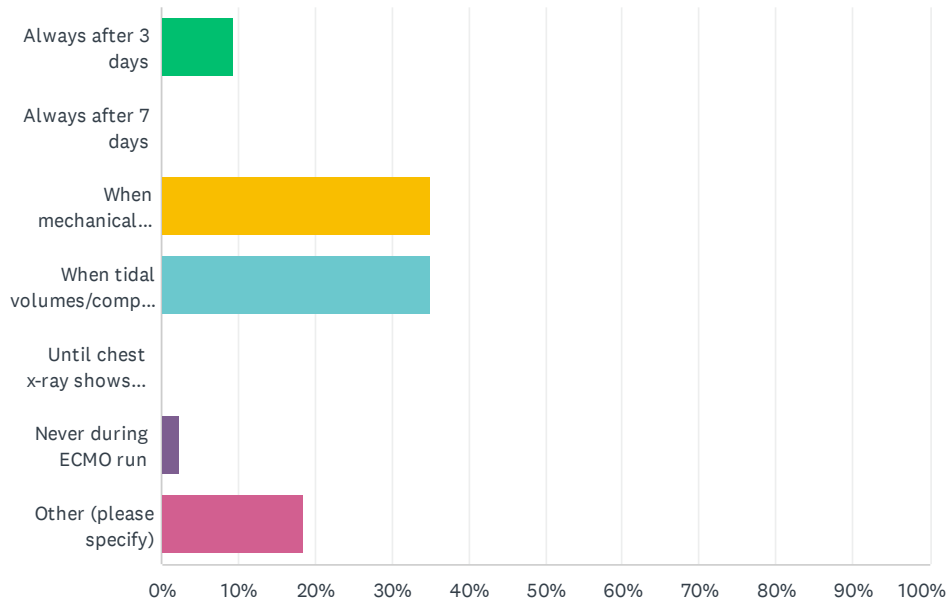

| ANSWER CHOICES                                 | RESPONSES |
|------------------------------------------------|-----------|
| Always after 3 days                            | 9.30% 4   |
| Always after 7 days                            | 0.00% 0   |
| When mechanical ventilation support diminishes | 34.88% 15 |
| When tidal volumes/compliance increase         | 34.88% 15 |
| Until chest x-ray shows improvement            | 0.00% 0   |
| Never during ECMO run                          | 2.33% 1   |
| Other (please specify)                         | 18.60% 8  |
| <b>TOTAL</b>                                   | <b>43</b> |

| # | OTHER (PLEASE SPECIFY)                                                                                                  | DATE                |
|---|-------------------------------------------------------------------------------------------------------------------------|---------------------|
| 1 | When assessing neurological status and when performing a V-V ECMO weaning trial.                                        | 10/20/2022 11:05 AM |
| 2 | Depends on patient                                                                                                      | 10/11/2022 10:43 PM |
| 3 | when ECMO oxygenation is adequate                                                                                       | 10/7/2022 5:10 PM   |
| 4 | As soon as it is tolerated. Daily trials                                                                                | 9/20/2022 6:42 AM   |
| 5 | Usually day 3-5 first try, but recent years with COVID it was often impossible to get the patient awake and cooperative | 9/15/2022 8:58 AM   |
| 6 | as soon as possible!                                                                                                    | 9/14/2022 10:23 PM  |
| 7 | Consider stopping sedatives after 24 hours                                                                              | 9/14/2022 6:32 PM   |
| 8 | Once stabilized post cannulation (within 24 hours typically) we have the patient awake with                             | 9/14/2022 1:06 PM   |

supported breathing on APRV

---

### Q19 What is the main reason for you to restart sedatives during V-V ECMO?

Answered: 43 Skipped: 9

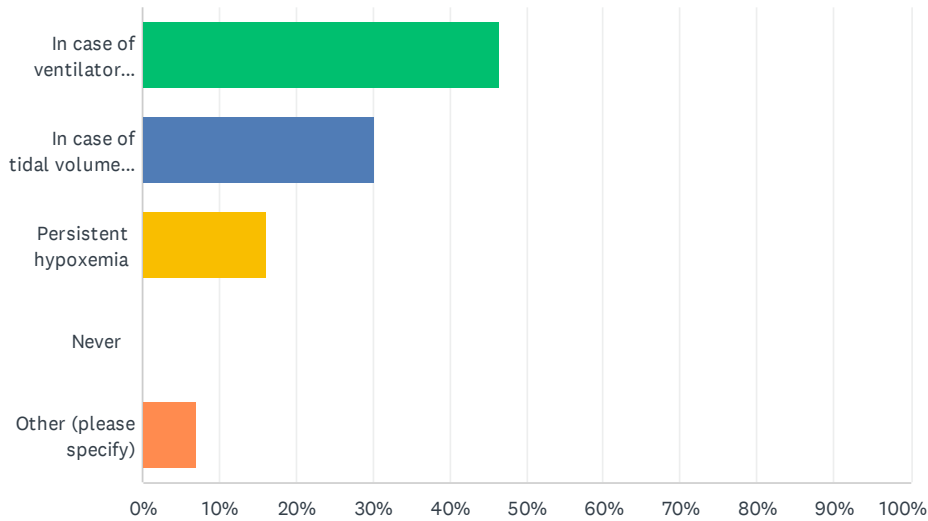

| ANSWER CHOICES                                                             | RESPONSES |
|----------------------------------------------------------------------------|-----------|
| In case of ventilator dyssynchrony                                         | 46.51% 20 |
| In case of tidal volumes >6ml/kg or Ppeak/Driving pressure at upper limits | 30.23% 13 |
| Persistent hypoxemia                                                       | 16.28% 7  |
| Never                                                                      | 0.00% 0   |
| Other (please specify)                                                     | 6.98% 3   |
| <b>TOTAL</b>                                                               | <b>43</b> |

| # | OTHER (PLEASE SPECIFY)                                                                             | DATE               |
|---|----------------------------------------------------------------------------------------------------|--------------------|
| 1 | Agitated delirium causing flow issues or danger of self harm (cannula dislodgement)                | 9/14/2022 1:06 PM  |
| 2 | Lung protection                                                                                    | 9/14/2022 12:33 PM |
| 3 | Combination of high respiratory drive with inability to improve situation with ventilator settings | 9/14/2022 11:55 AM |



### Q20 When you decide to restart sedatives, do you

Answered: 43 Skipped: 9

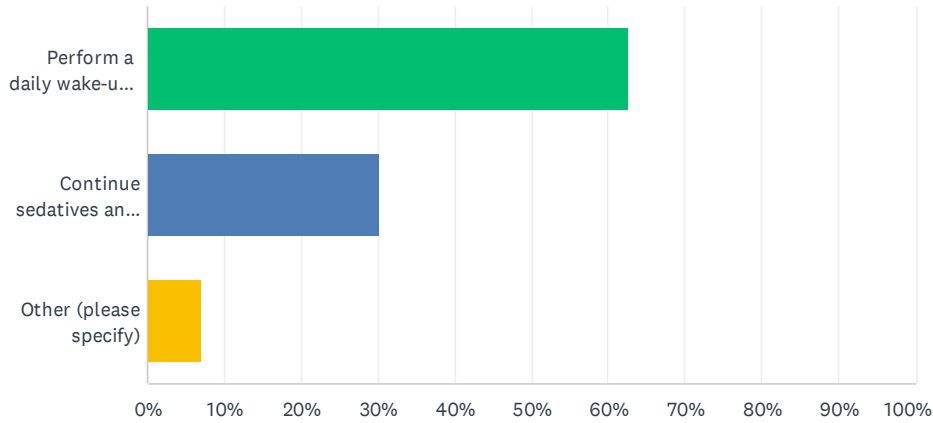

| ANSWER CHOICES                                                                      | RESPONSES |
|-------------------------------------------------------------------------------------|-----------|
| Perform a daily wake-up call                                                        | 62.79% 27 |
| Continue sedatives and stop using the same conditions as the first stopping attempt | 30.23% 13 |
| Other (please specify)                                                              | 6.98% 3   |
| <b>TOTAL</b>                                                                        | <b>43</b> |

| # | OTHER (PLEASE SPECIFY)                                                                                                                                       | DATE                |
|---|--------------------------------------------------------------------------------------------------------------------------------------------------------------|---------------------|
| 1 | We do perform daily wake-up calls (assessing neuro status) when this is clinically indicated, usually we employ sedation until also is clinically indicated. | 10/20/2022 11:05 AM |
| 2 | Depends on patient                                                                                                                                           | 10/11/2022 10:43 PM |
| 3 | Use Dex or sedating anti-psychotics to help bridge until the drug-induced delirium (from opiates and benzos) resolves                                        | 9/14/2022 1:06 PM   |

## Q21 When do you permanently stop sedatives during V-V ECMO?

Answered: 43 Skipped: 9

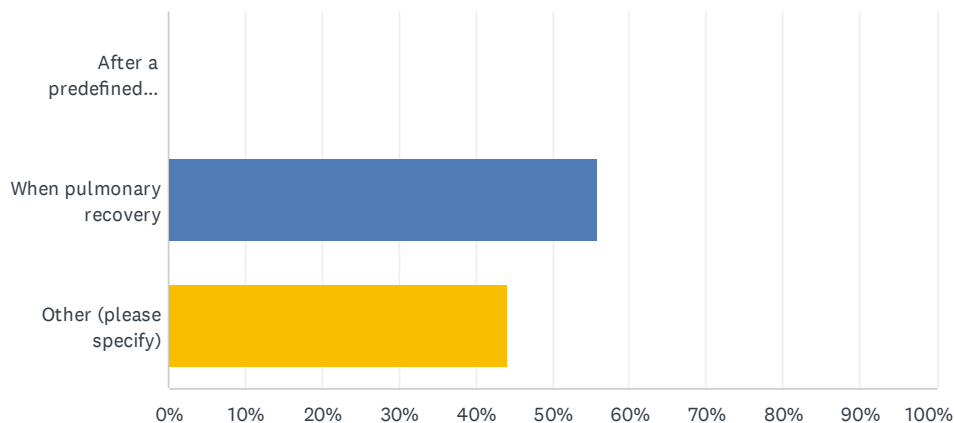

| ANSWER CHOICES            | RESPONSES |           |
|---------------------------|-----------|-----------|
| After a predefined period | 0.00%     | 0         |
| When pulmonary recovery   | 55.81%    | 24        |
| Other (please specify)    | 44.19%    | 19        |
| <b>TOTAL</b>              |           | <b>43</b> |

| #  | OTHER (PLEASE SPECIFY)                                                                            | DATE                |
|----|---------------------------------------------------------------------------------------------------|---------------------|
| 1  | Usually never - there is always a "back up" dose of for example dexmedetomidine needed.           | 10/20/2022 11:05 AM |
| 2  | When possible                                                                                     | 10/13/2022 11:32 AM |
| 3  | Depends on patient                                                                                | 10/11/2022 10:43 PM |
| 4  | When the pt tolerates being off them                                                              | 10/8/2022 1:15 AM   |
| 5  | if oxygenation is adequate on ECMO                                                                | 10/7/2022 5:10 PM   |
| 6  | When work of breathing well controlled                                                            | 10/7/2022 12:51 PM  |
| 7  | case dependend                                                                                    | 10/5/2022 5:37 PM   |
| 8  | When patients accepts ECMO treatment without sedatives without jeopardizing recovery of the lungs | 9/21/2022 11:46 AM  |
| 9  | when the patient supports being awake on ecmo, we use rather for a long period dexmedetomedine    | 9/20/2022 7:11 PM   |
| 10 | As soon as tolerated (dyssynchrony, agitation, hypoxia etc0                                       | 9/20/2022 6:42 AM   |
| 11 | if patient tolerates ventilation or is spontaneous breathing                                      | 9/15/2022 10:32 AM  |
| 12 | If RASS score is adequate, but this is rarely achieved without some sedatives.                    | 9/15/2022 8:58 AM   |
| 13 | when patient is able to be supported on VV ECMO and vent without need for additional sedation     | 9/14/2022 10:23 PM  |
| 14 | If the patient tolerates stopping sedation from an oxygenation and synchrony perspective          | 9/14/2022 8:07 PM   |
| 15 | As soon as possible after starting VV ECMO                                                        | 9/14/2022 6:32 PM   |
| 16 | As soon as tolerated; extremely variable depending on respiratory effort and patient tolerance    | 9/14/2022 5:16 PM   |

Mechanical ventilation during Extracorporeal Membrane Oxygenation

SurveyMonkey

|    |                      |                    |
|----|----------------------|--------------------|
| 17 | tolerate awake state | 9/14/2022 3:45 PM  |
| 18 | When not needed      | 9/14/2022 1:06 PM  |
| 19 | Clinical judgement   | 9/14/2022 12:33 PM |

## Q22 After which predefined period do you permanently stop sedatives during V-V ECMO?

Answered: 0 Skipped: 52

| # | RESPONSES               | DATE |
|---|-------------------------|------|
|   | There are no responses. |      |

### Q23 Do you perform tracheostomy in V-V ECMO patients?

Answered: 43 Skipped: 9

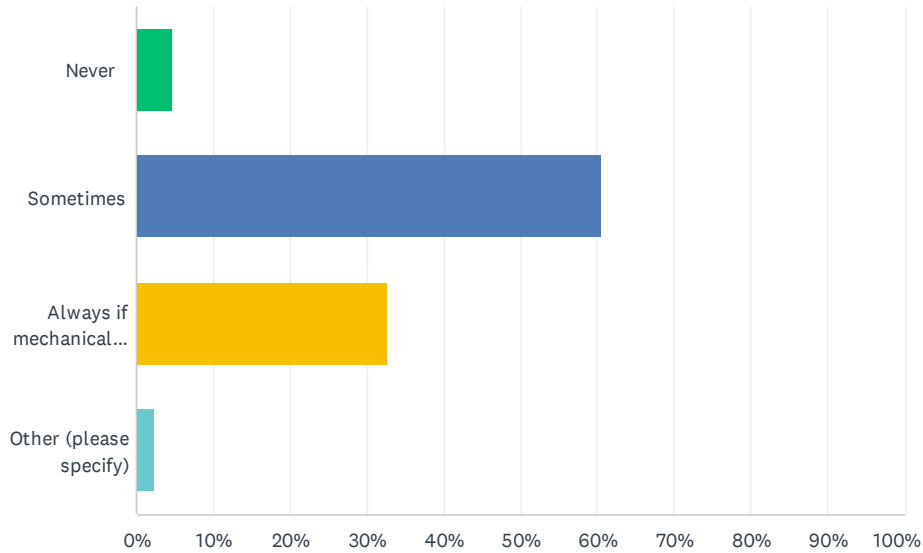

| ANSWER CHOICES                                                             | RESPONSES |
|----------------------------------------------------------------------------|-----------|
| Never                                                                      | 4.65% 2   |
| Sometimes                                                                  | 60.47% 26 |
| Always if mechanical ventilation duration of more than 2 weeks is expected | 32.56% 14 |
| Other (please specify)                                                     | 2.33% 1   |
| <b>TOTAL</b>                                                               | <b>43</b> |

| # | OTHER (PLEASE SPECIFY) | DATE               |
|---|------------------------|--------------------|
| 1 | MV ≥ 3 weeks           | 9/14/2022 11:19 AM |

### Q24 As patients supported with V-V ECMO, do you preferably wean and discontinue:

Answered: 43 Skipped: 9

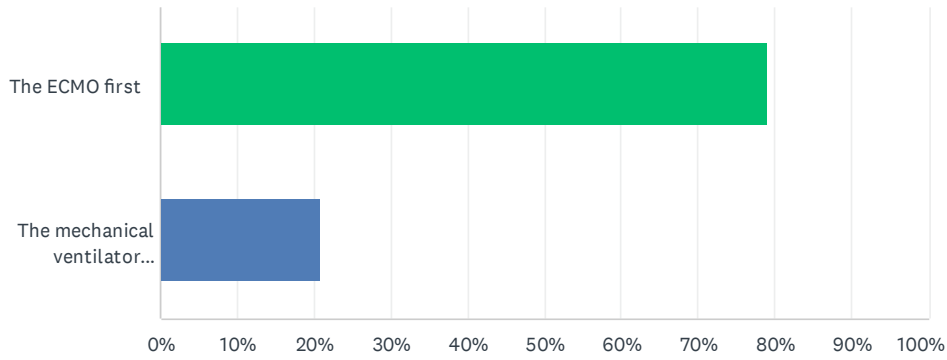

| ANSWER CHOICES                  | RESPONSES |           |
|---------------------------------|-----------|-----------|
| The ECMO first                  | 79.07%    | 34        |
| The mechanical ventilator first | 20.93%    | 9         |
| <b>TOTAL</b>                    |           | <b>43</b> |

### Q25 How many adult V-A ECMO cases per annum?

Answered: 44 Skipped: 8

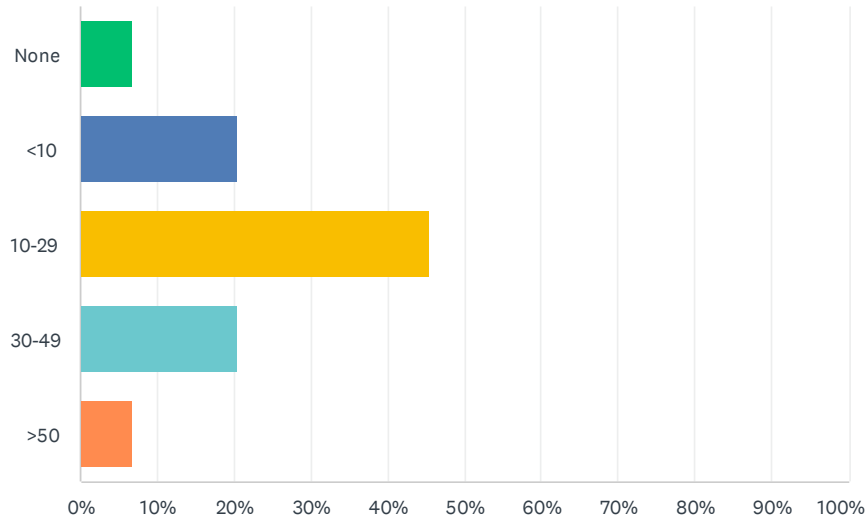

| ANSWER CHOICES | RESPONSES |           |
|----------------|-----------|-----------|
| None           | 6.82%     | 3         |
| <10            | 20.45%    | 9         |
| 10-29          | 45.45%    | 20        |
| 30-49          | 20.45%    | 9         |
| >50            | 6.82%     | 3         |
| <b>TOTAL</b>   |           | <b>44</b> |

### Q26 Do you use a different ventilation strategies during V-A ECMO for a cardiac indication (e.g. cardiogenic shock) without respiratory compromise?

Answered: 41 Skipped: 11

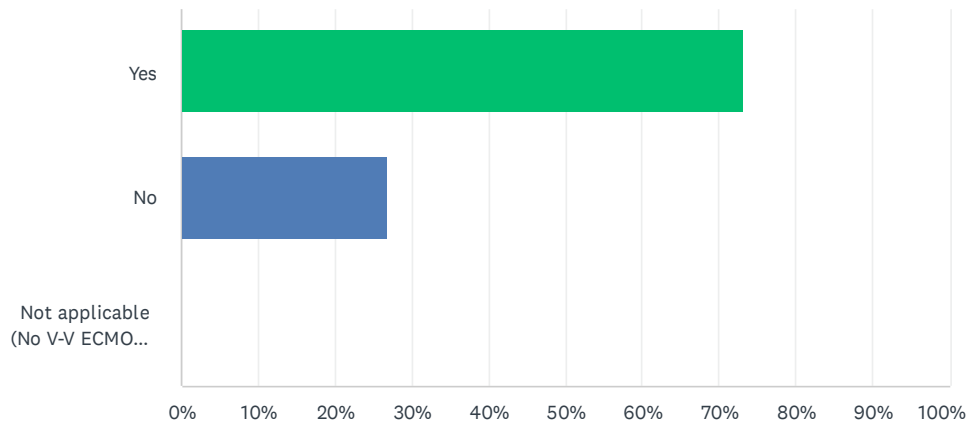

| ANSWER CHOICES                                       | RESPONSES |           |
|------------------------------------------------------|-----------|-----------|
| Yes                                                  | 73.17%    | 30        |
| No                                                   | 26.83%    | 11        |
| Not applicable (No V-V ECMO patients in your center) | 0.00%     | 0         |
| <b>TOTAL</b>                                         |           | <b>41</b> |



### Q27 Do you use lungrest ventilation settings when you place a patient on V-A ECMO for a cardiac indication (e.g. cardiogenic shock) without respiratory compromise?

Answered: 29 Skipped: 23

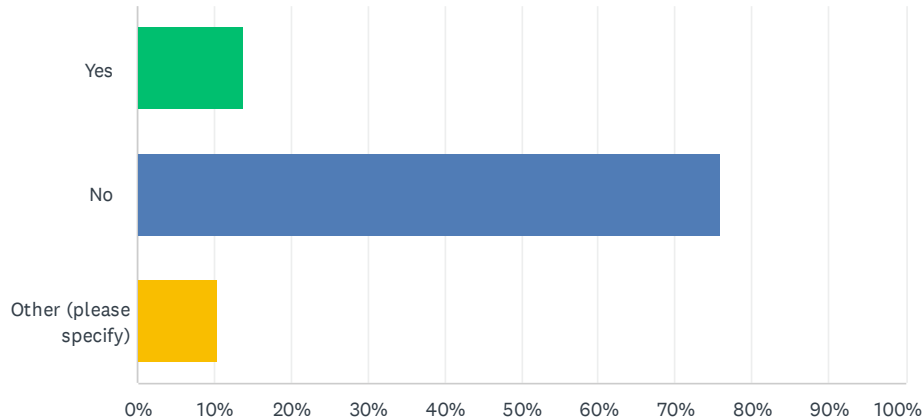

| ANSWER CHOICES         | RESPONSES |
|------------------------|-----------|
| Yes                    | 13.79% 4  |
| No                     | 75.86% 22 |
| Other (please specify) | 10.34% 3  |
| <b>TOTAL</b>           | <b>29</b> |

| # | OTHER (PLEASE SPECIFY)                                                             | DATE               |
|---|------------------------------------------------------------------------------------|--------------------|
| 1 | if concomitant ARDS                                                                | 9/14/2022 10:24 PM |
| 2 | APRV using TCAV strategy which is personalized for their lung status (good or bad) | 9/14/2022 1:09 PM  |
| 3 | Depending on lung mechanics                                                        | 9/14/2022 12:36 PM |

### Q28 Which ventilator settings do you preferably/routinely use as the initial primary mode during V-A ECMO support for cardiac indication (e.g. cardiogenic shock) without respiratory compromise?

Answered: 29 Skipped: 23

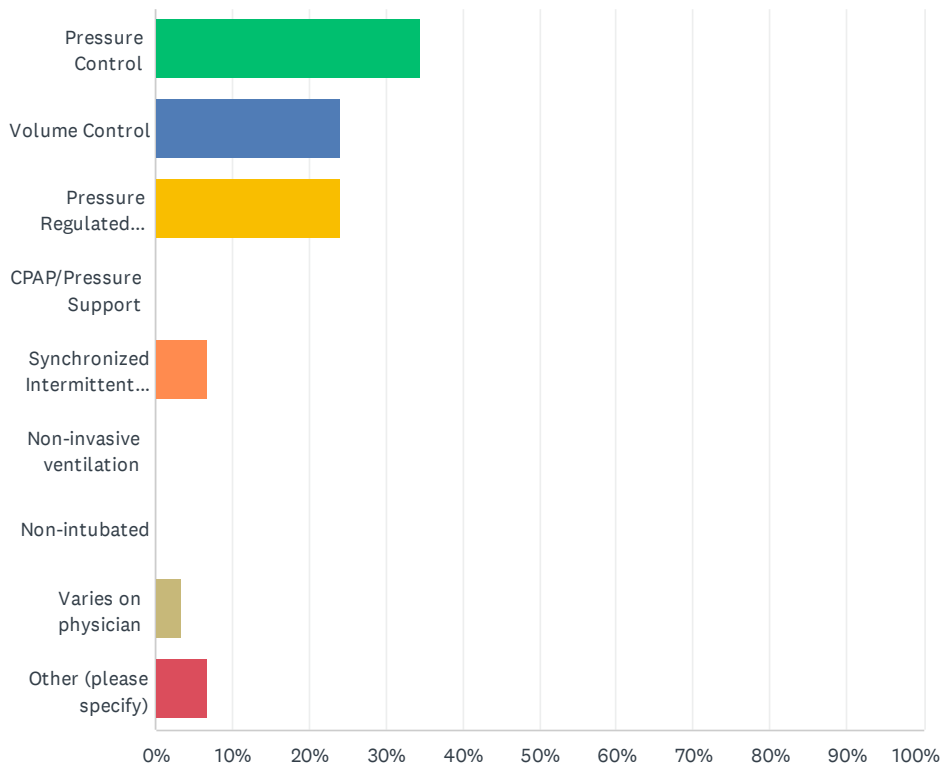

| ANSWER CHOICES                                  | RESPONSES |           |
|-------------------------------------------------|-----------|-----------|
| Pressure Control                                | 34.48%    | 10        |
| Volume Control                                  | 24.14%    | 7         |
| Pressure Regulated Volume Control               | 24.14%    | 7         |
| CPAP/Pressure Support                           | 0.00%     | 0         |
| Synchronized Intermittent Mandatory Ventilation | 6.90%     | 2         |
| Non-invasive ventilation                        | 0.00%     | 0         |
| Non-intubated                                   | 0.00%     | 0         |
| Varies on physician                             | 3.45%     | 1         |
| Other (please specify)                          | 6.90%     | 2         |
| <b>TOTAL</b>                                    |           | <b>29</b> |

| # | OTHER (PLEASE SPECIFY)                        | DATE               |
|---|-----------------------------------------------|--------------------|
| 1 | APRV                                          | 9/14/2022 1:09 PM  |
| 2 | it depends if the patient is intubated or not | 9/14/2022 11:22 AM |



## Q29 What are your initial mechanical ventilation settings during V-A ECMO for a cardiac indication (e.g. cardiogenic shock) without respiratory compromise?

Answered: 28 Skipped: 24

| ANSWER CHOICES          | RESPONSES |    |
|-------------------------|-----------|----|
| PEEP cm H2O             | 100.00%   | 28 |
| Driving pressure cm H2O | 82.14%    | 23 |
| Plateau pressure cm H2O | 78.57%    | 22 |
| Tidal volume ml/kg      | 92.86%    | 26 |
| Respiratory rate/min    | 89.29%    | 25 |

| #  | PEEP CM H2O                            | DATE                |
|----|----------------------------------------|---------------------|
| 1  | 10                                     | 10/13/2022 11:22 AM |
| 2  | 10                                     | 10/8/2022 1:18 AM   |
| 3  | 12                                     | 10/7/2022 12:53 PM  |
| 4  | 5-15                                   | 10/5/2022 5:40 PM   |
| 5  | 5                                      | 9/30/2022 1:03 PM   |
| 6  | 5                                      | 9/23/2022 10:19 PM  |
| 7  | 15                                     | 9/21/2022 11:48 AM  |
| 8  | 10                                     | 9/21/2022 10:24 AM  |
| 9  | 5                                      | 9/20/2022 7:16 PM   |
| 10 | 5-12                                   | 9/20/2022 6:45 AM   |
| 11 | 10                                     | 9/19/2022 4:26 AM   |
| 12 | 5-10                                   | 9/15/2022 10:37 AM  |
| 13 | 10-12                                  | 9/15/2022 9:00 AM   |
| 14 | 5                                      | 9/14/2022 10:24 PM  |
| 15 | 10                                     | 9/14/2022 9:39 PM   |
| 16 | 5-10                                   | 9/14/2022 8:11 PM   |
| 17 | 6 - 10                                 | 9/14/2022 5:25 PM   |
| 18 | 10                                     | 9/14/2022 5:18 PM   |
| 19 | 5                                      | 9/14/2022 3:47 PM   |
| 20 | 5-10                                   | 9/14/2022 2:28 PM   |
| 21 | 10                                     | 9/14/2022 12:45 PM  |
| 22 | 5-10                                   | 9/14/2022 12:36 PM  |
| 23 | 10                                     | 9/14/2022 12:22 PM  |
| 24 | needed within lung protective settings | 9/14/2022 11:49 AM  |
| 25 | 5                                      | 9/14/2022 11:27 AM  |
| 26 | 5-8                                    | 9/14/2022 11:26 AM  |

Mechanical ventilation during Extracorporeal Membrane Oxygenation

SurveyMonkey

| 27 | 10                                     | 9/14/2022 11:22 AM  |
|----|----------------------------------------|---------------------|
| 28 | 6                                      | 9/14/2022 11:21 AM  |
| #  | DRIVING PRESSURE CM H2O                | DATE                |
| 1  | 15                                     | 10/13/2022 11:22 AM |
| 2  | 13                                     | 10/7/2022 12:53 PM  |
| 3  | 10                                     | 9/21/2022 11:48 AM  |
| 4  | 10-15                                  | 9/21/2022 10:24 AM  |
| 5  | max 15                                 | 9/20/2022 7:16 PM   |
| 6  | 10-12                                  | 9/20/2022 6:45 AM   |
| 7  | <14                                    | 9/15/2022 10:37 AM  |
| 8  | <15                                    | 9/15/2022 9:00 AM   |
| 9  | 10-15                                  | 9/14/2022 10:24 PM  |
| 10 | 20                                     | 9/14/2022 9:39 PM   |
| 11 | <15                                    | 9/14/2022 8:11 PM   |
| 12 | < 12                                   | 9/14/2022 5:25 PM   |
| 13 | 10                                     | 9/14/2022 5:18 PM   |
| 14 | 10                                     | 9/14/2022 3:47 PM   |
| 15 | <15                                    | 9/14/2022 2:28 PM   |
| 16 | 14                                     | 9/14/2022 12:45 PM  |
| 17 | 10                                     | 9/14/2022 12:36 PM  |
| 18 | 10                                     | 9/14/2022 12:22 PM  |
| 19 | needed within lung protective settings | 9/14/2022 11:49 AM  |
| 20 | 14                                     | 9/14/2022 11:27 AM  |
| 21 | 15                                     | 9/14/2022 11:26 AM  |
| 22 | not an issue                           | 9/14/2022 11:22 AM  |
| 23 | 15                                     | 9/14/2022 11:21 AM  |
| #  | PLATEAU PRESSURE CM H2O                | DATE                |
| 1  | 25                                     | 10/13/2022 11:22 AM |
| 2  | <30                                    | 10/8/2022 1:18 AM   |
| 3  | 25                                     | 10/7/2022 12:53 PM  |
| 4  | 25                                     | 9/21/2022 11:48 AM  |
| 5  | 25                                     | 9/21/2022 10:24 AM  |
| 6  | max 28                                 | 9/20/2022 7:16 PM   |
| 7  | 15-24                                  | 9/20/2022 6:45 AM   |
| 8  | <25                                    | 9/15/2022 10:37 AM  |
| 9  | <30                                    | 9/14/2022 10:24 PM  |
| 10 | < 30                                   | 9/14/2022 8:11 PM   |
| 11 | < 25                                   | 9/14/2022 5:25 PM   |
| 12 | 20                                     | 9/14/2022 5:18 PM   |
| 13 | 20                                     | 9/14/2022 3:47 PM   |
| 14 | <30                                    | 9/14/2022 2:28 PM   |

Mechanical ventilation during Extracorporeal Membrane Oxygenation

SurveyMonkey

|    |                                        |                    |
|----|----------------------------------------|--------------------|
| 15 | 30                                     | 9/14/2022 12:45 PM |
| 16 | 20                                     | 9/14/2022 12:36 PM |
| 17 | 10                                     | 9/14/2022 12:22 PM |
| 18 | needed within lung protective settings | 9/14/2022 11:49 AM |
| 19 | 19                                     | 9/14/2022 11:27 AM |
| 20 | 30                                     | 9/14/2022 11:26 AM |
| 21 | not an issue                           | 9/14/2022 11:22 AM |
| 22 | 25                                     | 9/14/2022 11:21 AM |

| #  | TIDAL VOLUME ML/KG                     | DATE                |
|----|----------------------------------------|---------------------|
| 1  | 6-8                                    | 10/13/2022 11:22 AM |
| 2  | 6ml/kg                                 | 10/8/2022 1:18 AM   |
| 3  | 6                                      | 10/7/2022 12:53 PM  |
| 4  | 4-6                                    | 10/5/2022 5:40 PM   |
| 5  | 6                                      | 9/30/2022 1:03 PM   |
| 6  | 6                                      | 9/23/2022 10:19 PM  |
| 7  | 6 ml/kg                                | 9/21/2022 11:48 AM  |
| 8  | max 8                                  | 9/20/2022 7:16 PM   |
| 9  | 6                                      | 9/20/2022 6:45 AM   |
| 10 | 6                                      | 9/19/2022 4:26 AM   |
| 11 | 6-8                                    | 9/15/2022 10:37 AM  |
| 12 | 4-6                                    | 9/15/2022 9:00 AM   |
| 13 | 6 cc/kg                                | 9/14/2022 10:24 PM  |
| 14 | 6                                      | 9/14/2022 9:39 PM   |
| 15 | 6 cc/kg IBW                            | 9/14/2022 8:11 PM   |
| 16 | 6 ml/kg                                | 9/14/2022 5:25 PM   |
| 17 | 5-10                                   | 9/14/2022 3:47 PM   |
| 18 | 6                                      | 9/14/2022 2:28 PM   |
| 19 | 6                                      | 9/14/2022 12:45 PM  |
| 20 | 4-6                                    | 9/14/2022 12:36 PM  |
| 21 | 5-6                                    | 9/14/2022 12:22 PM  |
| 22 | needed within lung protective settings | 9/14/2022 11:49 AM  |
| 23 | 7                                      | 9/14/2022 11:27 AM  |
| 24 | 6                                      | 9/14/2022 11:26 AM  |
| 25 | 8                                      | 9/14/2022 11:22 AM  |
| 26 | 6                                      | 9/14/2022 11:21 AM  |

| # | RESPIRATORY RATE/MIN | DATE                |
|---|----------------------|---------------------|
| 1 | 15-20                | 10/13/2022 11:22 AM |
| 2 | 14                   | 10/8/2022 1:18 AM   |
| 3 | 12                   | 10/7/2022 12:53 PM  |
| 4 | 10-20                | 10/5/2022 5:40 PM   |
| 5 | 10                   | 9/30/2022 1:03 PM   |

Mechanical ventilation during Extracorporeal Membrane Oxygenation

SurveyMonkey

|    |                                                                                            |                    |
|----|--------------------------------------------------------------------------------------------|--------------------|
| 6  | 10                                                                                         | 9/23/2022 10:19 PM |
| 7  | 15                                                                                         | 9/21/2022 11:48 AM |
| 8  | 10-16                                                                                      | 9/21/2022 10:24 AM |
| 9  | depends on the support of the ecmo, if it is partial support, we ventilate more frequently | 9/20/2022 7:16 PM  |
| 10 | 10-16                                                                                      | 9/20/2022 6:45 AM  |
| 11 | 12                                                                                         | 9/19/2022 4:26 AM  |
| 12 | 10-14                                                                                      | 9/15/2022 10:37 AM |
| 13 | 10-15                                                                                      | 9/15/2022 9:00 AM  |
| 14 | 12-16                                                                                      | 9/14/2022 10:24 PM |
| 15 | 10 - 15                                                                                    | 9/14/2022 5:25 PM  |
| 16 | 10                                                                                         | 9/14/2022 5:18 PM  |
| 17 | 10                                                                                         | 9/14/2022 3:47 PM  |
| 18 | 10 - 12                                                                                    | 9/14/2022 2:28 PM  |
| 19 | 20                                                                                         | 9/14/2022 12:45 PM |
| 20 | 12-16                                                                                      | 9/14/2022 12:36 PM |
| 21 | 10                                                                                         | 9/14/2022 12:22 PM |
| 22 | needed within lung protective settings                                                     | 9/14/2022 11:49 AM |
| 23 | 14                                                                                         | 9/14/2022 11:27 AM |
| 24 | 10                                                                                         | 9/14/2022 11:22 AM |
| 25 | 20                                                                                         | 9/14/2022 11:21 AM |

**Q30 Which sedatives do you preferably use during V-A ECMO support for a cardiac indication (e.g. cardiogenic shock) without respiratory compromise (please provide and rank max 3, leave the other fields blank)?**

Answered: 29 Skipped: 23

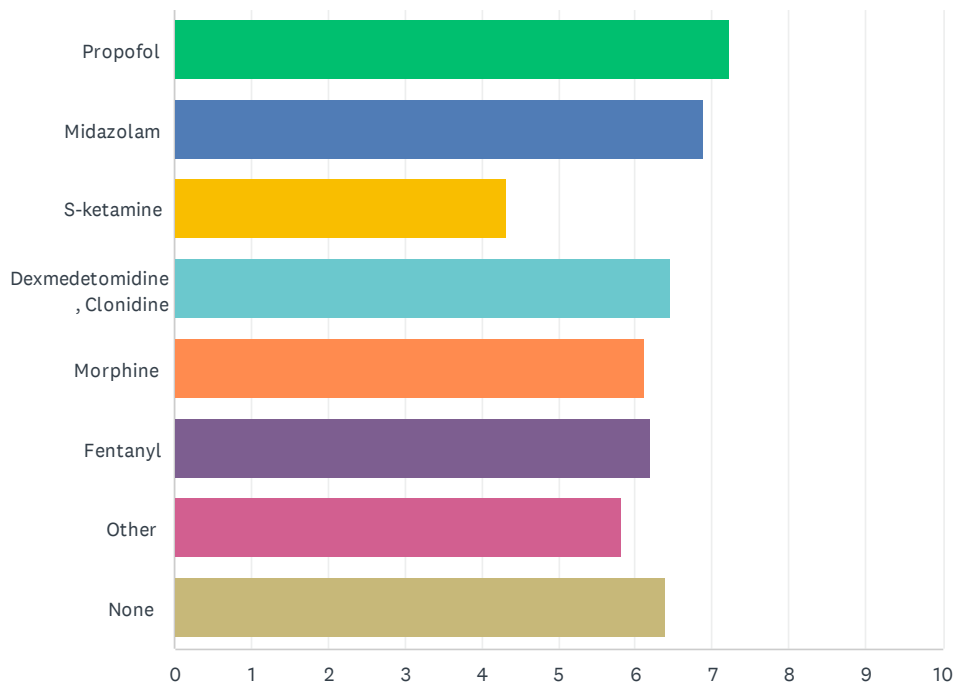

|                            | 1            | 2           | 3           | 4           | 5           | 6           | 7           | 8           | TOTAL | SCORE |
|----------------------------|--------------|-------------|-------------|-------------|-------------|-------------|-------------|-------------|-------|-------|
| Propofol                   | 54.55%<br>12 | 27.27%<br>6 | 9.09%<br>2  | 4.55%<br>1  | 4.55%<br>1  | 0.00%<br>0  | 0.00%<br>0  | 0.00%<br>0  | 22    | 7.23  |
| Midazolam                  | 31.25%<br>5  | 25.00%<br>4 | 43.75%<br>7 | 0.00%<br>0  | 0.00%<br>0  | 0.00%<br>0  | 0.00%<br>0  | 0.00%<br>0  | 16    | 6.88  |
| S-ketamine                 | 0.00%<br>0   | 16.67%<br>1 | 16.67%<br>1 | 0.00%<br>0  | 33.33%<br>2 | 16.67%<br>1 | 16.67%<br>1 | 0.00%<br>0  | 6     | 4.33  |
| Dexmedetomidine, Clonidine | 26.67%<br>4  | 20.00%<br>3 | 40.00%<br>6 | 6.67%<br>1  | 0.00%<br>0  | 6.67%<br>1  | 0.00%<br>0  | 0.00%<br>0  | 15    | 6.47  |
| Morphine                   | 12.50%<br>1  | 50.00%<br>4 | 12.50%<br>1 | 12.50%<br>1 | 0.00%<br>0  | 0.00%<br>0  | 12.50%<br>1 | 0.00%<br>0  | 8     | 6.13  |
| Fentanyl                   | 20.00%<br>2  | 20.00%<br>2 | 40.00%<br>4 | 10.00%<br>1 | 0.00%<br>0  | 10.00%<br>1 | 0.00%<br>0  | 0.00%<br>0  | 10    | 6.20  |
| Other                      | 16.67%<br>2  | 41.67%<br>5 | 16.67%<br>2 | 0.00%<br>0  | 8.33%<br>1  | 0.00%<br>0  | 8.33%<br>1  | 8.33%<br>1  | 12    | 5.83  |
| None                       | 60.00%<br>3  | 20.00%<br>1 | 0.00%<br>0  | 0.00%<br>0  | 0.00%<br>0  | 0.00%<br>0  | 0.00%<br>0  | 20.00%<br>1 | 5     | 6.40  |



### Q31 What is the main reason for you you to consider stopping sedatives and starting support ventilation during V-A ECMO for a cardiac indication (e.g. cardiogenic shock) without respiratory compromise?

Answered: 29 Skipped: 23

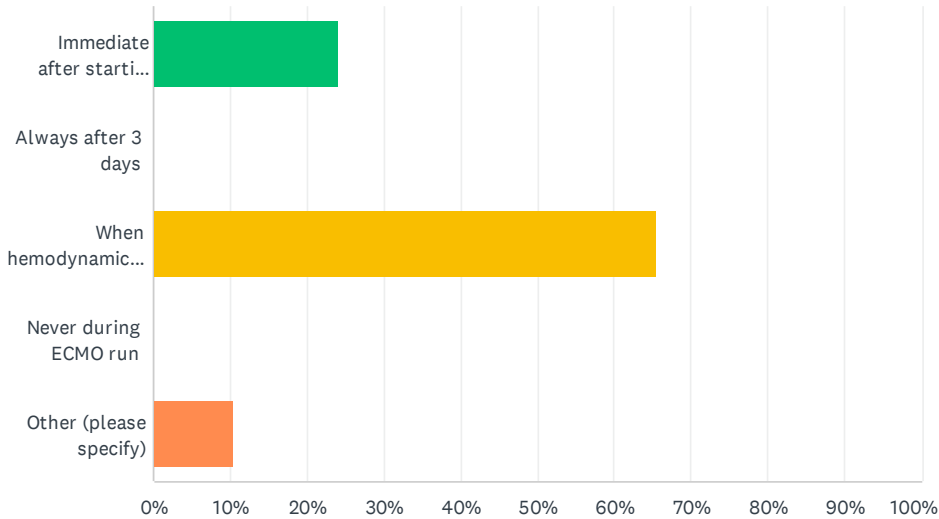

| ANSWER CHOICES                 | RESPONSES |
|--------------------------------|-----------|
| Immediate after starting ECMO  | 24.14% 7  |
| Always after 3 days            | 0.00% 0   |
| When hemodynamic stabilization | 65.52% 19 |
| Never during ECMO run          | 0.00% 0   |
| Other (please specify)         | 10.34% 3  |
| <b>TOTAL</b>                   | <b>29</b> |

| # | OTHER (PLEASE SPECIFY)                                                                       | DATE              |
|---|----------------------------------------------------------------------------------------------|-------------------|
| 1 | very case dependent                                                                          | 10/5/2022 5:40 PM |
| 2 | to check neurological status if ECPR and after the patient has been stable for several hours | 9/20/2022 7:16 PM |
| 3 | Not clear what you are asking                                                                | 9/14/2022 8:11 PM |

### Q32 What is the main reason for you to restart sedatives during V-A ECMO for a cardiac indication (e.g. cardiogenic shock) without respiratory compromise?

Answered: 29 Skipped: 23

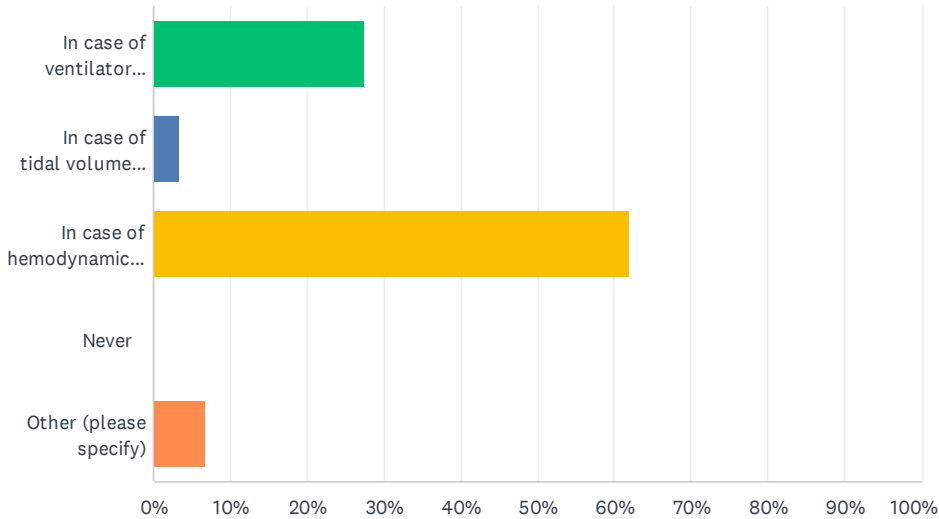

| ANSWER CHOICES                                                 | RESPONSES |
|----------------------------------------------------------------|-----------|
| In case of ventilator dyssynchrony                             | 27.59% 8  |
| In case of tidal volumes >6ml/kg and pressures at upper limits | 3.45% 1   |
| In case of hemodynamic instability                             | 62.07% 18 |
| Never                                                          | 0.00% 0   |
| Other (please specify)                                         | 6.90% 2   |
| <b>TOTAL</b>                                                   | <b>29</b> |

| # | OTHER (PLEASE SPECIFY)                                  | DATE               |
|---|---------------------------------------------------------|--------------------|
| 1 | if patient is unsafe on minimal to no sedation          | 9/14/2022 10:24 PM |
| 2 | Combination of vigorous efforts and large tidal volumes | 9/14/2022 5:25 PM  |

### Q33 When you decide to restart sedatives, do you

Answered: 29 Skipped: 23

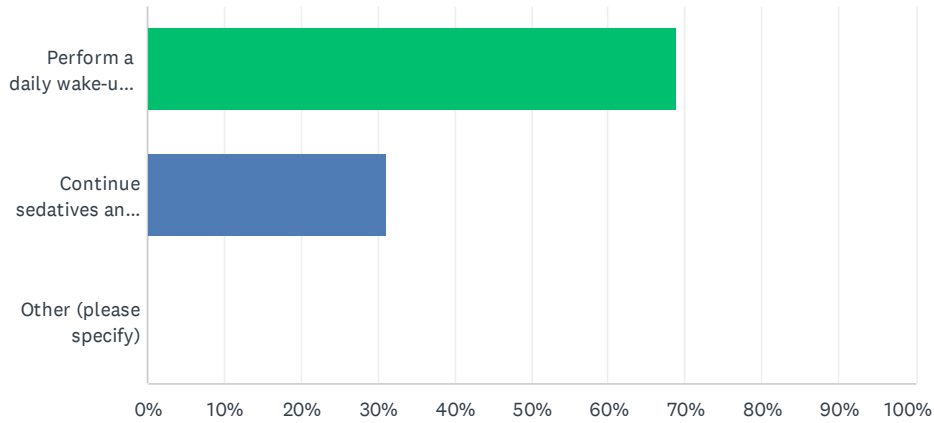

| ANSWER CHOICES                                                                      | RESPONSES |
|-------------------------------------------------------------------------------------|-----------|
| Perform a daily wake-up call                                                        | 68.97% 20 |
| Continue sedatives and stop using the same conditions as the first stopping attempt | 31.03% 9  |
| Other (please specify)                                                              | 0.00% 0   |
| <b>TOTAL</b>                                                                        | <b>29</b> |

| # | OTHER (PLEASE SPECIFY)  | DATE |
|---|-------------------------|------|
|   | There are no responses. |      |

### Q34 Do you perform tracheostomy in V-A ECMO patients?

Answered: 41 Skipped: 11

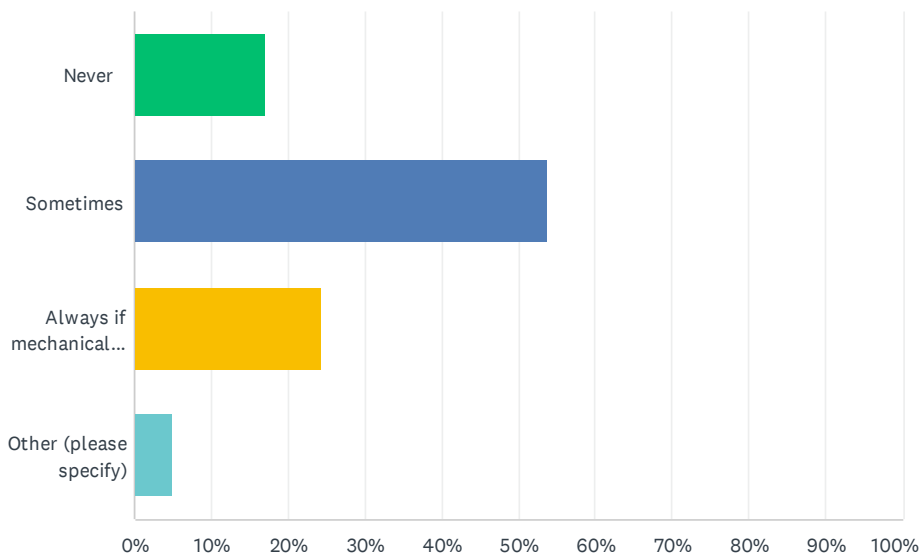

| ANSWER CHOICES                                                             | RESPONSES |
|----------------------------------------------------------------------------|-----------|
| Never                                                                      | 17.07% 7  |
| Sometimes                                                                  | 53.66% 22 |
| Always if mechanical ventilation duration of more than 2 weeks is expected | 24.39% 10 |
| Other (please specify)                                                     | 4.88% 2   |
| <b>TOTAL</b>                                                               | <b>41</b> |

| # | OTHER (PLEASE SPECIFY)                                                                                                           | DATE                |
|---|----------------------------------------------------------------------------------------------------------------------------------|---------------------|
| 1 | We have not yet performed the procedure on a V-A ECMO patient - usually after cardiac recovery an ECMO wean was indicated first. | 10/20/2022 11:06 AM |
| 2 | Rarely                                                                                                                           | 9/14/2022 12:36 PM  |
